# 1                    **Benchmarking brain organoid recapitulation of fetal corticogenesis**

## 2                    **AUTHORS**

3                    Cristina Cheroni<sup>1,2,3,#</sup>, Sebastiano Trattaro<sup>1,2,3,#</sup>, Nicolò Caporale<sup>1,2,3</sup>, Alejandro López-Tobón<sup>1,2,3</sup>, Erika  
4                    Tenderini<sup>1,4</sup>, Flavia Troglio<sup>1,2,3</sup>, Michele Gabriele<sup>1,2,5</sup>, Raul Bardini Bressan<sup>6</sup>, Steven M Pollard<sup>6</sup>, William T  
5                    Gibson<sup>7,8</sup>, Giuseppe Testa<sup>1,2,3,\*</sup>

6  
7                    <sup>1</sup> Department of Experimental Oncology, European Institute of Oncology IRCCS, Via Adamello 16, 20139,  
8                    Milan, Italy

9                    <sup>2</sup> Department of Oncology and Hemato-Oncology, University of Milan, Via Santa Sofia 9, 20122, Milan, Italy

10                    <sup>3</sup> Human Technopole, Viale Rita Levi-Montalcini 1, 20157, Milan, Italy

11                    <sup>4</sup> Current address: Telethon Institute of Genetics and Medicine (TIGEM), Pozzuoli, Naples, Italy, Via Campi  
12                    Flegrei, 34 - 80078.

13                    <sup>5</sup> Current address: Department of Biological Engineering, MIT, Cambridge, MA; Broad Institute of MIT and  
14                    Harvard, Cambridge, MA.

15                    <sup>6</sup> Centre for Regenerative Medicine, Institute for Regeneration and Repair, and Edinburgh Cancer Research  
16                    UK Centre, University of Edinburgh, Edinburgh, UK. EH16 4UU.

17                    <sup>7</sup> BC Children's Hospital Research Institute, 950 West 28th Avenue, Vancouver, BC, Canada V5Z 4H4

18                    <sup>8</sup> Department of Medical Genetics, University of British Columbia, Vancouver, BC, Canada V6T 1Z4

19                    #These authors contributed equally

20                    \*Correspondence: giuseppe.testa@fht.org; giuseppe.testa@unimi.it; giuseppe.testa@ieo.it.

## 21                    **KEYWORDS**

22                    Brain organoids; human corticogenesis; neurodevelopment; disease-modelling; transcriptomics;  
23                    neurodevelopmental disorders; psychiatric disorders; brain development; gene co-expression patterns.

24

25 **ABSTRACT**

26 Brain organoids are becoming increasingly relevant to dissect the molecular mechanisms underlying  
27 psychiatric and neurological conditions. The *in vitro* recapitulation of key features of human brain  
28 development affords the unique opportunity of investigating the developmental antecedents of  
29 neuropsychiatric conditions in the context of the actual patients' genetic backgrounds. Specifically, multiple  
30 strategies of brain organoid (BO) differentiation have enabled the investigation of human cerebral  
31 corticogenesis *in vitro* with increasing accuracy. However, the field lacks a systematic investigation of how  
32 closely the gene co-expression patterns seen in cultured BO from different protocols match those observed  
33 in fetal cortex, a paramount information for ensuring the sensitivity and accuracy of modeling disease  
34 trajectories. Here we benchmark BO against fetal corticogenesis by integrating transcriptomes from in-house  
35 differentiated cortical BO (CBO), other BO systems, human fetal brain samples processed in-house, and  
36 prenatal cortices from the BrainSpan Atlas. We identified co-expression patterns and prioritized hubs of  
37 human corticogenesis and CBO differentiation, highlighting both well-preserved and discordant trends across  
38 BO protocols, including different degrees of heterochronicity in differentiation across BO models compared  
39 to fetal cortex. Our approach provides a framework to directly compare the extent of *in vivo/in vitro*  
40 alignment of neurodevelopmentally relevant processes and their attending temporalities, structured as an  
41 accessible resource to query for modelling human corticogenesis and the neuropsychiatric outcomes of its  
42 alterations.

43

## 44 INTRODUCTION

45 The introduction of cell reprogramming technologies and 3D brain organoids (BO) have made the spatial and  
46 temporal dynamics of human brain development experimentally accessible. BO are thus becoming central to  
47 the investigation of how genetic vulnerabilities or environmental perturbations can alter physiological  
48 neurodevelopment and seed the unfolding of psychiatric and neurological conditions<sup>1,2</sup>. As we and others  
49 recently demonstrated, the exposure of specific windows of vulnerability is proving of particular value,  
50 highlighting how temporally defined or even transient alterations in neurodevelopmental trajectories can  
51 bring about major mental health outcomes, from language delay to ASD<sup>3-5</sup>. Indeed, a growing body of  
52 literature testifies to the edge that BO are bringing to the modelling of complex neuropsychiatric disorders,  
53 from autism spectrum disorder to schizophrenia, bipolar disorder and beyond<sup>6-8</sup>. Given the central role of  
54 the cortex for the higher order functions primarily affected in neuropsychiatric conditions, determining how  
55 closely BO recapitulate human cerebral corticogenesis is thus crucial for harnessing their full potential as *in*  
56 *vitro* models of neurodevelopmental processes and their physiopathological outcomes. To this end,  
57 comparison between ex-vivo human fetal cortex and BO gene expression has started to uncover the extent  
58 of this recapitulation, alongside the peculiarities of different methods. Specifically, the transcriptomic and  
59 epigenomic landscapes of BO were characterized and compared to isogenic fetal cortices, finding significant  
60 overlaps<sup>9</sup>. Very long-term BO cultures were meanwhile shown to capture early post-natal developmental  
61 transitions<sup>10</sup>, while spatial similarity maps of BO against reference were generated to assess organoid  
62 engineering protocols and to annotate cell fates<sup>11</sup>. Further detail emerged from integrative analyses showing  
63 an overexpression of extracellular matrix (ECM)-related genes in BO associated with the first steps of  
64 differentiation in 2D<sup>12</sup>, a higher vulnerability to cellular stress in some organoid cultures compared to primary  
65 tissue<sup>13,14</sup>, and the existence of protocol-specific transcriptional bypasses in BO differentiation<sup>15</sup>.

66 These efforts have provided a wealth of information, which remains however difficult to harmonize and use  
67 productively due to the lack of dedicated resources where transcriptional hubs of  
68 development/differentiation are categorized, ranked, and made available for consultation. Such tools are  
69 needed to help researchers select protocols and time-points based not only on the expression of genes of

70 interest but also on the broader context of functional partitions and temporal dynamics of that expression.  
71 Building on these considerations, we benchmarked selected BO paradigms against human corticogenesis  
72 with the aim of templating such a resource through a framework that allows its iterative adaptation and  
73 growth as the neural modelling field continues to mature. Specifically, we profiled in-house a cohort of  
74 cortical BO (CBO)<sup>16,17</sup>, derived from multiple individuals and differentiation rounds over 200 days, and  
75 integrated it with i) our in-house cohort of primary samples, ii) publicly available transcriptomic data from  
76 BO different for degree of patterning, and iii) prenatal cortical samples of the BrainSpan Atlas (BS). The  
77 characterization of the gene expression landscape of BS and CBO led to the definition of co-expression  
78 patterns relevant for human prenatal corticogenesis and CBO differentiation, as well as to the ranking and  
79 categorization in functional domains of their transcriptional hubs. Development/differentiation co-  
80 expression patterns were made available. We then cross-compared CBO differentiation, primary samples,  
81 and other BO systems<sup>12,18,19</sup>. These analyses revealed the overlap between co-expression patterns of prenatal  
82 cortex and CBO, allowed their visualization in the selected BO systems, and pointed at partial  
83 heterochronicity in the transcriptional recapitulation of corticogenesis by different BO methods.  
84 In sum, our analyses represent a benchmark for the interrogation of the transcriptional networks  
85 characterizing human prenatal corticogenesis and CBO differentiation and uncover their modulation also in  
86 other BO protocols of widespread use for neuropsychiatric disease modelling. By comparing co-expression  
87 patterns of human corticogenesis and BO differentiation across protocols, our work represents a template  
88 for the benchmarking of BO and their applications in disease modeling.

89

## 90 RESULTS

### 91 Gene co-expression analysis highlights the transcriptional programs of the prenatal human 92 corticogenesis

93 To categorize the transcriptional hubs of the developing human cortex, we took advantage of the BrainSpan  
94 Atlas BS, the most comprehensive transcriptional characterization of the fetal human brain.

95 In a landmark effort, Miller et al. profiled by microarray fetal brain at mid-gestation<sup>20</sup>, establishing a first  
96 reference transcriptional atlas. More recently, a multi-modal characterization of human brain was  
97 performed<sup>21</sup>. We applied a similar approach at the transcriptome level, focusing our effort specifically on the  
98 prenatal cerebral cortex. This allowed us to reconstruct the transcriptional circuitries of the human fetal  
99 corticogenesis with increased resolution. We selected a total of 162 data points (**Figure 1A**) from cerebral  
100 cortex at post-conceptual weeks (PCW) 8-37.

101 Principal component analysis (PCA) identified developmental stage as the main driver of sample differences,  
102 with PC2 separating very early stages (PCW 8-9) from early ones (PCW 12-13) followed by a progression of  
103 time-points in PC1 (**Figure 1B**). Likewise, stage-wise correlation analysis detected a first shift in the  
104 transcriptional landscape from PCW 8-9 to 12-24 and a second, less clear-cut, characterizing PCW 25-37  
105 (**Supplementary Figure 1A**). The same analysis on postnatal cortex showed higher homogeneity compared  
106 to prenatal time-points (**Supplementary Figure 1B**), indicating a more profound transcriptional evolution  
107 during the fetal phase, especially till PCW24.

108 We applied gene ontology enrichment analysis (GO) to the top 600 genes associated with PC1 or PC2  
109 according to PCA loadings. We retrieved for PC1 categories associated with ion channels, lipid metabolism  
110 and transcriptional regulation, while we found terms related to neuronal maturation and cell division for PC2  
111 (**Figure 1B; Supplementary Figure 1C-D**).

112 To identify the transcriptional programs regulating corticogenesis in an unsupervised manner, we applied  
113 weighted gene co-expression network analysis (WGCNA), uncovering 17 gene co-expression modules (**Figure**  
114 **1C and Supplementary File 1**). We summarized the co-expression profile of each module by its first PC  
115 (module eigengene, ME) and related it to developmental stage, highlighting several modules as positively or

116 negatively correlated. BS\_Turquoise, BS\_Pink, BS\_Grey60 and BS\_Midnightblue showed positive correlation,  
117 while BS\_Black and BS\_Green were negatively associated with developmental progression (**Figure 1C**). Other  
118 modules displayed changes in more restricted time windows (e.g. BS\_Yellow, BS\_Blue, BS\_Red, **Figure 1C**).  
119 The functional characterization of BS modules pointed to clear-cut biological domains for several of them,  
120 such as glutamatergic transmission and synapse for BS\_Turquoise, ion channels for BS\_Pink, DNA replication  
121 for BS\_Black, and cell division for BS\_Yellow (**Figure 1 D-G**). Finally, we reconstructed the co-expression  
122 network selecting the top-75 genes (according to intramodular connectivity) and then applied network  
123 analysis. Central nodes of BS\_Turquoise and BS\_Pink networks were related to neuronal functions and  
124 included synaptic proteins (CAMK2N2, CAMK2B and GDA), receptor subunits (GRIN1, GRIN3A) and potassium  
125 channel subunits (KCNT1, KCNQ4, KCNC3, KCNC4). BS\_Midnight-blue included the upper layer neuron  
126 markers CUX2 and SATB2 among its most central genes (**Supplementary figure 1F**). BS\_Yellow and BS\_Black  
127 hub genes were strongly enriched in cell cycle genes.

128 The reconstructed networks also encompassed genes less studied in corticogenesis (e.g. for BS\_Turquoise  
129 CATSPERZ, HAGHL, ADAMTS8, and KCN4-TEX40), thus allowing us to hypothesize their involvement by a guilt-  
130 by-association approach (**Figure 1 D-G and Supplementary figure 1F**).

131 Overall, we identified transcriptional circuitries related to developmental transitions and functional domains  
132 of human corticogenesis, reconstructing relevant gene co-expression networks. These networks, their  
133 behaviour, and the relevance of every gene composing them are available in **Supplementary File 1**.

134

135 Cortical brain organoids globally resemble the developing human fetal cortex and evolve in  
136 two steps

137 Upon characterization of the transcriptional dynamics defining human corticogenesis, we investigated the  
138 extent of their recapitulation in BO, with an experimental design that allowed us to measure interindividual  
139 and technical variability. We analysed in-house differentiated CBO generated as previously described<sup>16</sup>, for a  
140 total of 43 single-organoid samples from 4 control hiPSC lines profiled over 200 days. We profiled single  
141 organoids to tackle technical variability of differentiation and we analyzed 2 independent organoid batches  
142 to measure reproducibility. Additionally, we profiled a cohort of primary fetal CNS tissues (weeks of  
143 gestational age -WGA- 13 and 15) and 2D cultures (WGA 11, donor 1, and 19, donor 2) for a total of 4  
144 individuals (**Figure 2A**); this dataset, processed as CBO, allowed direct comparisons between the two.  
145 PCA showed temporal evolution of CBO with early stages forming individual clusters and later time-points  
146 resulting more intermingled. CBO evolved towards the fetal tissue, with clustering of mature organoids in  
147 proximity of fetal cortex. Conversely, 2D cultures clustered apart (**Figure 2B**). Specific focus on CBO and  
148 relative functional analysis allowed us to associate PC1-driving genes to cell cycle and neuronal  
149 differentiation (**Supplementary figure 2A-B**).

150 To quantitatively characterize CBO evolution, we performed stage-wise differential expression analysis (DEA)  
151 comparing each stage against the previous. This approach highlighted a biphasic differentiation dynamic,  
152 with fast changes until day 100 followed by subtler modulations (**Figure 2C**). The fast-evolving phase was  
153 characterized by a large number of differentially expressed genes (DEGs), related to neuronal fate  
154 commitment and maturation (upregulated) and cell cycle, transcription, and translation dynamics  
155 (downregulated) (**Figure 2D-E**). The number of DEGs decreased considerably in the slow-evolving phase and  
156 confirmed cell division as a prominent down-regulated category. Upregulated genes were more  
157 heterogeneous in function (**Supplementary figure 2D-E**)<sup>22-28</sup>.

158 We then analysed dynamic changes among DEGs by visualizing the fold-change of consecutive comparisons  
159 (e.g. day 50vs25 against 100vs50, etc). Neuronal differentiation regulators, such as EOMES, LHX2, and  
160 FEZF2<sup>29-31</sup>, were modulated dynamically in the fast-evolving phase, while we detected upregulation of the

161 astrocytic markers HEPACAM, AQP4, AGT and APOE in the slow-evolving phase<sup>32-35</sup>. We also observed  
162 upregulation of GABAergic interneuron markers after day 100, in line with other studies<sup>36,37</sup> (**Supplementary**  
163 **figure 2F**).

164 We then estimated CBO cell-type proportions with bulk deconvolution exploiting a scRNAseq atlas of the  
165 developing human cortex as reference<sup>38</sup>. Deconvolution methods have already been employed to estimate  
166 cell type proportions in the fetal brain<sup>21</sup> and have been shown to give reliable estimates when benchmarked  
167 against immunohistochemical quantification of the main adult brain cell types, overcoming some of the  
168 selection biases affecting single-cell estimations<sup>39</sup>. From day 25 till day 100 CBO showed increase of excitatory  
169 neurons mirrored by a drop in ventricular radial glia, cycling progenitors, and intermediate progenitors. Outer  
170 radial glia increased from day 100 onwards (**Figure 2F**).

171 Lastly, we identified cortex-enriched genes by comparing the cortical samples of our in-house fetal brain  
172 tissue dataset (WGA 13,15) against hiPSCs and subsequently excluding common DEGs found with the same  
173 approach for other brain areas. We analyzed expression of cortex-enriched DEGs in CBO and found  
174 upregulation of genes related to glutamatergic neuron function alongside downregulation of ECM genes  
175 (**Figure 2G-J**).



176 WGCNA identifies cortical brain organoids' differentiation trajectories towards the  
177 glutamatergic fate

178 To identify transcriptional patterns in CBO differentiation we applied WGCNA, identifying 14 co-expression  
179 modules (**Supplementary Figure 3A, Supplementary File 2**). Correlation with differentiation stage uncovered  
180 as strongly correlated modules the CBO\_Turquoise and CBO\_Black (positive correlation) and CBO\_Brown and  
181 CBO\_Blue (negative correlation) (**Figure 3A**). We analyzed the behaviour of CBO\_Turquoise and CBO\_Black  
182 ME in the 8 samples across time-points (**Figure 3B**) detecting a steady increase over time. While  
183 CBO\_Turquoise modulation was reproducible across replicates, the CBO\_Black was more variable, pointing  
184 to a small set of genes (180 genes against the 3279 of the CBO\_Turquoise) with a less robust behaviour. The  
185 variability of this subset of genes was observed mainly in 2 samples, which however showed patterns in line  
186 with the other samples for other modules.

187 GO enrichment analysis for CBO\_Turquoise and CBO\_Black retrieved terms related to neuronal fate  
188 commitment and maturation. Network reconstruction confirmed CBO\_Turquoise hub genes as related to  
189 neurotransmission and synaptic function (e.g. NRXN2, AGAP2, SLC4AE, GABBR1 and GRM5), while the  
190 CBO\_Black network comprised several transcription factors related to excitatory neuron identity (NEUROD6,  
191 SLA, BCL11B, RORB) (**Figure 3B-C**).

192 CBO\_Brown and CBO\_Blue ME were instead decreasing along differentiation; the first was associated to DNA  
193 replication and cell cycle, while the second to more general functions such as transcriptional and translational  
194 regulation (**Figure 3B-C**).

195 WGCNA also detected modules characterized by non-monotonic trends through differentiation. Among  
196 them, CBO\_Green and CBO\_Red showed levels dropping from Day25 to Day50, and increasing again at late  
197 stages. Both modules were enriched in genes related to cell adhesion and ECM organization (**Supplementary**  
198 **Figure 3 B-C**).

199 In summary, we time-resolved the transcriptional evolution of CBO by identifying co-expression patterns and  
200 transcriptional hubs driving their differentiation. We found overall consistency among lines from

201 independent individuals and replicates. Networks, their behaviour, and relevance of every gene composing  
202 them are available in the **Supplementary File 2**.

## 203 Benchmarking of brain organoids against prenatal human corticogenesis reveals

### 204 heterochronicity of differentiation across protocols

205 To compare CBO against other protocols and evaluate them versus the fetal cortex, we selected three  
206 external BO datasets for which RNAseq was publicly available. These datasets, different for degree of  
207 patterning and culture conditions, included samples at comparable time-points (from 0 to 100 days). The  
208 selected BO datasets were: i) minimally-guided neural organoids (MGO)<sup>12</sup>; ii) forebrain organoids (FO)<sup>18</sup>; iii)  
209 telencephalic aggregates (TA)<sup>19</sup>, including a first step of 2D differentiation (**Figure 4A and Supplementary**  
210 **Figure 4A-D**).

211 Stage-wise DEA revealed also for MGO, FO, and TA a decrease in the number of DEGs as differentiation  
212 progresses (**Figure 4B**). However, the slow-evolving phase, which started between day 100-150 in CBO  
213 (**Figure 2C**), was anticipated for all other protocols (day 40-60) (**Figure 4B**). Bulk deconvolution focusing on  
214 two broad cell populations (early progenitors and neurons) showed progenitors as predominant in all models  
215 at early stages (**Figure 4C**). In CBO, the proportions of the two populations were comparable at day 50, with  
216 neurons prevalent from day 100 onwards. MGO, FO and TA showed a similar but accelerated dynamic  
217 compared to CBO, suggesting a more rapid transcriptional maturation.

218 We then tested the transcriptional similarity of each model towards BS fetal cortex (**Figure 4D**). Whole-  
219 transcriptome correlation showed for CBO a gradual increase of similarity towards mid and late PCW over  
220 time. We observed a more time-compressed evolution among MGO and FO, which already by day 60 showed  
221 an extent of similarity with late PCW that CBO reached only by day 100. For CBO and TA, the dataset  
222 encompassed organoids generated from different control individuals. CBO demonstrated robust  
223 reproducibility across genetic backgrounds and batches of differentiation, while TA were less tolerant to  
224 interindividual variability. These observations were further confirmed by using CBO as reference  
225 (**Supplementary Figure 4E**).

226 Overall, several lines of evidence pointed towards heterochronicity across BO models in recapitulating the  
227 transcriptional modulations of corticogenesis.

228

229 Gene signatures specific for brain cell subpopulations and functions unveil dynamics of  
230 brain organoid differentiation

231 We then examined how specific hallmarks of brain cell sub populations and functions evolve during BO  
232 differentiation. To this end, we compiled a catalogue of genes by manually curating new signatures from  
233 literature (**Figure 5**) and by using signatures proposed in published studies<sup>9,13</sup>. We observed their expression  
234 dynamics across BO and the developing cortex. Expression levels of signature genes are reported in **Figure 5**  
235 and **Supplementary Figure 5**; the dynamics characterizing each model compared to the fetal cortex are  
236 detailed in **Supplementary Table 2**.

237 Fetal cortex showed drastic reduction of cell cycle, neural stem cell, apical progenitor, and intermediate  
238 progenitor gene levels between PCW 9-12, in line with WGCNA results. We found in BO models a less abrupt  
239 reduction of cell cycle and apical progenitor markers. The intermediate progenitor signature was found to  
240 peak at different time-points across models.

241 Excitatory neuron markers were particularly expressed at early PCW in the fetal cortex, a trend mirrored by  
242 CBO; MGO, FO and TA showed a more persistent expression throughout differentiation (**Supplementary**  
243 **Table 2**).

244 oRG genes were well expressed in BS at PCW 8-9, decreased from PCW 12 and increased again at later stages,  
245 when astrocyte markers also appeared. CBO showed constant up-regulation of the whole oRG signature  
246 starting from day 100, while for FO this was observed already at day 40; MGO and TA showed a partial  
247 expression at the available time-points. Astrocyte markers were inconsistently detected in BO, except for  
248 CBO that showed stable expression at day 150 and 200.

249 Considering that the examined BO protocols were based on different degrees of patterning and culturing  
250 conditions, we then looked at brain area specific genes, markers of off-target tissues, markers of  
251 neurotransmission, and stress-related genes (detailed in **Supplementary Figure 5, Supplementary Figure 6,**  
252 **Supplementary Table 2**). As markers of metabolic stress, we looked at the expression of glycolytic and ER-  
253 stress genes<sup>13</sup>. We found an overall stable expression of those genes throughout cortical development as  
254 well as in BO, without hints of strong up-regulation at advanced time-points.

## 255 Brain organoids differentially capture distinct transcriptional patterns of fetal corticogenesis

256 The knowledge base of gene co-expression modules we reconstructed for corticogenesis and CBO  
257 differentiation allowed us to directly compare modules identified in cortex/CBO and follow their behavior in  
258 the other BO models. First, we measured the overlap between the two sets of WGCNA modules  
259 (**Supplementary Figure 7**). Fetal BS\_Turquoise, BS\_Pink, BS\_Midnight-blue, and BS\_Grey60 genes, steadily  
260 increasing their expression along corticogenesis, significantly overlapped with organoid CBO\_Turquoise,  
261 which showed the same trend. Similarly, BS\_Yellow and BS\_Black, functionally associated to cell cycle,  
262 showed steady decrease over time and overlapped with CBO\_Brown, which had similar behaviour and  
263 functional characterization (**Supplementary Figure 7**).

264 We then analyzed the behaviour of these BS modules in each organoid dataset by following their ME across  
265 differentiation, revealing a close resemblance to fetal cortex trends (**Figure 6A-B**). In a complementary  
266 approach, we applied the same analysis on the most relevant modules detected in CBO. The behaviour of  
267 CBO\_Turquoise and CBO\_Brown in fetal cortex and other BO protocols was consistent with the one described  
268 in CBO. CBO\_Black genes induction was variable across models and replicates (**Supplementary Figure 8A**).  
269 CBO\_Blue genes behaved similarly in all BO, and showed instead a non-monotonic behaviour in BS, with  
270 peaks of expression at very early and very late PCW (**Supplementary Figure 8B**).

271 Finally, we analyzed how BO recapitulated patterns of non-monotonic expression through time. BS\_Red,  
272 BS\_Blue and CBO\_Red, CBO\_Green significantly overlapped between the two networks. The visualisation of  
273 BS\_Red and BS\_Blue trends in BO revealed differences across protocols. CBO mostly displayed the same U-  
274 shape found in BS, although with a milder drop at intermediate stages. Conversely, MGO showed very little  
275 variation, FO showed a drop at day 100, and TA showed an opposite trend for the red module and no change  
276 for the blue one (**Figure 6C**). Likewise, CBO and BS behaved similarly for the set of CBO\_Red and CBO\_Green  
277 genes, while these modules showed no, little or opposite variation in MGO, FO and TA (**Supplementary Figure**  
278 **8C**). Among the functions of this set of modules, ECM and cell adhesion were prevalent.

279 Together, these results suggested that monotonic gene expression dynamics related to neuron specification  
280 and progenitor proliferation are shared between fetal cortex and CBO and are largely recapitulated by the

281 analyzed BO paradigms. Conversely, trends of non-monotonic expression are largely recapitulated in CBO  
282 and less robustly in other BO systems at the examined time-points.  
283

## 284 DISCUSSION

285 Despite the complexity of neuropsychiatric conditions, in terms of both phenotypic and time course  
286 heterogeneity, it is now well established that BO can allow the discovery of relevant developmental  
287 endophenotypes that are starting to illuminate disease pathogenesis with first inroads also in terms of  
288 patients' stratification and drug discovery<sup>8,40</sup>. The ambition is thus rapidly progressing from the initial focus  
289 on monogenic syndromes of high penetrance to the more high throughput and challenging interrogation of  
290 polygenic loadings for mental health vulnerability, including in terms of the developmental antecedents of  
291 its later onset manifestations. Yet, the more central neurodevelopment becomes to our understanding of  
292 mental health, the more we need to gain a full understanding of its experimental recapitulation *in vitro*, so  
293 as to define clear benchmarks across systems and thereby empirically guide the most appropriate disease  
294 modelling designs. Towards this goal, here we first defined co-expression patterns characterizing human  
295 corticogenesis *in vivo* and *in vitro* and then organized them in interactive tables where gene relevance can  
296 be visualized, together with the overall behaviour of these patterns along fetal cortex development and CBO  
297 differentiation (**Supplementary File 1 and 2**). The generation of this knowledge base allowed us to perform  
298 cross-comparisons between BS, CBO and other BO paradigms, quantifying the preservation of co-expression  
299 patterns of corticogenesis in these models. To our knowledge, this represents the first resource of such kind.  
300 Similar analyses were performed on BS and BO<sup>10,12</sup>, however without focus on prenatal cortex, accessibility  
301 to gene modules composition, or prioritization of transcriptional hubs (both known and novel). Thus, this  
302 knowledge base templates an open framework for the benchmarking of modelling studies and serves as an  
303 easy access platform to interrogate when choosing the experimental system that best suits specific modeling  
304 needs or research questions. Several studies provided insights on the variability of BO, with considerable  
305 efforts of standardization. Our results demonstrated CBO reproducibility in recapitulating the transcriptional  
306 landscape of prenatal corticogenesis, in line with other reports<sup>10,41</sup>, with a developmentally relevant timing.  
307 We observed that TA were more variable compared to CBO in terms of cell composition and global  
308 transcriptome when considering hiPSCs from different individuals. The same evaluation could not be carried  
309 out for MGO and FO due to the availability of a single genetic background.

310 Several analytical approaches (DEA, whole-transcriptome correlation with fetal cortex, bulk deconvolution)  
311 revealed a fast-evolving phase followed by a slow-evolving one during CBO differentiation. Among genes  
312 showing modulation also in the slow-evolving phase, we found up-regulation of GABAergic neuron markers  
313 (such as CALB2, SCGN, SLC6A11), in line with previous studies<sup>15,36,37,42</sup>. Among the functional categories  
314 emerging when analysing the slow-evolving phase, we observed an up-regulation of ECM-related genes. We  
315 also observed upregulation of genes related to mesoderm, however the majority of them is expressed also  
316 in astrocytes/reactive astrocytes<sup>32,43,44</sup>. The developmental timing of astrocytes appearance in CBO (day 100-  
317 150 – week 14.3-21.4) aligned with the human prenatal cortex. The interplay between neuronal and  
318 astrocytic cells is increasingly recognized in neuropsychiatric disorders<sup>45-47</sup>, therefore the characterization of  
319 their differentiation in BO compared to fetal cortex is important to guide disease modelling.

320 In the limited time-frame available for external BO datasets, we confirmed their biphasic evolution. However,  
321 we observed heterochronicity among protocols. We compared similar *in vitro* ages for all protocols analyzed,  
322 with the CBO dataset including also very late stages, and observed that MGO, FO and TA reached the slow-  
323 evolving phase earlier than CBO, with a greater proportion of neurons at earlier time-points. Additionally,  
324 MGO and FO globally correlated earlier with late stages of corticogenesis and CBO differentiation.

325 A possible explanation for these findings could be related to the maintenance of a more immature stage for  
326 longer time due to the prolonged use of EGF/bFGF during CBO differentiation, which however ended up  
327 matching more faithfully the *in vivo* counterpart. It is also known that iPSCs can have different propensity to  
328 neuronal induction depending on the line itself and on culture conditions<sup>48,49</sup>. However, both CBO and TA  
329 were generated from multiple hiPSCs lines reprogrammed from different individuals, thereby making  
330 improbable that differences across cell lines represent the main source of the observed heterochronicity  
331 among protocols. To our knowledge, this is the first description of such temporal dynamics in BO. Other  
332 reports comparing different paradigms focused on more heterogeneous time-points across protocols and  
333 other aspects of recapitulation<sup>13-15</sup>. Temporal dynamics recapitulation has remarkable relevance for disease-  
334 modelling, given the emergent convergence of molecular phenotypes of delay or acceleration in neuronal  
335 differentiation characterizing different clinical conditions<sup>50,4</sup>, and the eventuality of masking disease-relevant  
336 phenotypes if they are not correctly preserved<sup>51</sup>. Moreover, the tight link between neurodevelopment and



337 risk/resilience of neuropsychiatric disorders positions the *in vitro* recapitulation of developmental timing at  
338 the core of the choice between BO systems, also with a view to balance the preservation of accurate  
339 developmental timing vis a vis the accelerated yield of more mature cell types involved in later onset  
340 neuropsychiatric disorders. Our analyses started to elucidate these dynamics in BO, suggesting that CBO  
341 differentiation aligns with the *in vivo* temporality of corticogenesis.

342 Cellular stress in BO was previously reported by scRNAseq with the up-regulation of glycolytic and  
343 endoplasmic reticulum stress signatures in several paradigms compared to primary samples<sup>13,14</sup>. However,  
344 we detected a stable expression of stress-related signatures throughout differentiation in CBO, in all other  
345 BO datasets corroborating the hypothesis of a homeostatic metabolic state in organoids rather than a  
346 deleterious stress increase over-time, in line with a recent report<sup>10</sup>.

347 Cross-visualization of monotonic BS co-expression patterns in CBO and *vice versa* revealed concordance in  
348 their behaviour, a finding observed also for the other BO datasets. Conversely, modules with more complex  
349 temporal patterns were better recapitulated in CBO. Functional characterization of these modules pointed  
350 towards astrogenesis and ECM as predominant terms.

351 We also processed primary fetal tissues in-house, allowing direct comparisons against CBO because of the  
352 identical processing of the two datasets. The visualization of cortex-specific modulated genes in CBO  
353 highlighted again ECM. ECM genes have dynamic expression during corticogenesis, and have a role in  
354 regulating cortical folding, neuronal progenitor proliferation, and neuronal migration<sup>52-54</sup>. They have high  
355 expression in germinal zones and maturing/mature astrocytes<sup>52,55</sup> and are important for the evolution of the  
356 human brain, with progenitor cells expressing ECM components at higher levels than in mice<sup>56</sup>. ECM also  
357 plays critical roles in synaptic plasticity and electrophysiological properties<sup>57,58</sup>, and its alteration has been  
358 linked to neuropsychiatric disorders<sup>59,60</sup>. Our exposure of the differential regulation of ECM genes in BO  
359 compared to fetal cortex provides therefore a new relevant insight to consider when interpreting  
360 neuropsychiatric disease modelling datasets.

361 Taken together, our results contribute to the definition of transcriptional footprints and dynamics specific to  
362 prenatal corticogenesis, representing a collection of prioritized known and novel hubs categorized in well-  
363 defined functional domains and made available as interactive tables (**Supplementary file 1 and 2**). Our

364 approach describes the extent of *in vivo/in vitro* alignment of developmentally relevant processes and  
365 temporality, highlighting commonalities and diversities of different BO paradigms and providing a resource  
366 available for consultation when modelling physiological or pathological human corticogenesis.  
367

## 368 **METHODS**

### 369 hiPSCs reprogramming

370 Skin fibroblasts from four healthy individuals were reprogrammed using non integrating self-replicating  
371 mRNAs as previously described<sup>61</sup> (Stemgent, 00-0071) (CTL1, CTL3 and CTL4) or Sendai virus (CTL2)  
372 (CytoTune-iPS 2.0 Sendai Reprogramming Kit; Thermo Fisher Scientific, A16517). Fibroblasts of CTL1  
373 (phenotypically normal male without intellectual disability or other physician-diagnosed neuropsychiatric  
374 diagnosis) were received from BC Children's Hospital, Vancouver. CTL2 (male) hiPSC line was received from  
375 the Wellcome Trust Sanger Institute. CTL3 (male) hiPSC line was received from the university of Sheffield.  
376 Fibroblasts of CTL04 (female) were received from Genomic and Genetic Disorders Biobank at the IRCCS Casa  
377 Sollievo della Sofferenza, San Giovanni Rotondo (Italy, affiliated to the Telethon Network of Genetic  
378 Biobanks). hiPSC were cultured in TeSR-E8 medium (Stemcell technologies, 05990), with daily media change,  
379 at 37 °C, 5 % CO<sub>2</sub> and 3 % O<sub>2</sub> in standard incubators. hiPSC were grown on matrigel-coated dishes (Corning,  
380 354248) and passaged using ReLeSR™ (Stemcell technologies, 05872).

### 381 CBO differentiation

382 CBO were generated using an adaptation of the previously described protocol published by Pasca et al in  
383 2015<sup>17</sup>, introducing orbital shaking on day 12 of differentiation as described in<sup>16</sup>. Briefly, hiPSC were grown  
384 on feeders for 3-4 days in a medium composed of 80% DMEM/F12 medium (1:1), 20% Knockout serum  
385 (Thermo Fisher Scientific, 10828028), 1% Non-essential amino acids (NEAA, Lonza BE13- 14E), 0.1 mM cell  
386 culture grade 2-mercaptoethanol solution (Thermo Fisher Scientific, 31350010), 2 mM L-Glutamine (Thermo  
387 Fisher Scientific, 25030081), P/S 100 U/mL, and FGF2 at a final concentration of 20 ng/mL (Thermo Fisher  
388 Scientific, PHG0021). Daily media change was performed. Embryoid bodies (EB) were generated by detaching  
389 hiPSC with dispase for 40 minutes and plating on ultralow attachment 10 cm plates (Corning, 3262) in the  
390 first differentiating medium composed of 80% DMEM/F12 medium (1:1), 20% Knockout serum, 1% NEAA,  
391 0.1 mM cell culture grade 2-mercaptoethanol solution, 2 mM L-Glutamine, P/S, 100 U/mL, 7,5 µM  
392 Dorsomorphin (MedChem express, HY-13418A), 10 µM TGFβ inhibitor SB431542 (MedChem express, HY-

393 10431), and ROCK inhibitor 5  $\mu$ M. EB were grown in normal oxygen incubators. EB were left undisturbed for  
394 1 day and at 48h media change was performed with differentiation medium 1 without ROCK inhibitor.  
395 Dorsomorphin and TGF $\beta$  inhibitor are used to perform Dual-SMAD inhibition, pushing neuroectoderm  
396 specification. Dual-SMAD inhibition was performed for a total of 5 days, with daily media change. On day 6  
397 the second differentiation medium was added until day 25 with daily media change for the first 12 days, and  
398 then every other day. The second differentiation medium was composed of neurobasal medium (Thermo  
399 Fisher Scientific, 12348017) supplemented with 1X B-27 supplement without vitamin A (Thermo Fisher  
400 Scientific 12587001), 2 mM L-Glutamine, P/S, 100 U/mL, 20 ng/mL FGF2 and 20 ng/mL EGF (Thermo Fisher  
401 Scientific, PHG0313). Human FGF2 and EGF were used to amplify the pool of neural progenitors. On day 12,  
402 CBO were moved to ultra-low attachment 10 cm dishes and grown on shakers to enhance oxygen and  
403 nutrient supply. On day 26, FGF2 and EGF were replaced with 20 ng/mL brain-derived neurotrophic factor  
404 (BDNF, Peprtech 450-02) and 20 ng/mL neurotrophin-3 (NT3, Peprtech 450-03) to promote differentiation  
405 of neural progenitors towards the glutamatergic fate. From day 43 onwards, BDNF and NT3 were removed  
406 and from day 50 the medium was supplemented with Amphotericin $\beta$  to prevent mold formation.

#### 407 Culture conditions for fetal cortical cell

408 Human fetal neural stem cell cultures were derived and maintained as previously described<sup>62</sup>. They were  
409 derived from the cortex of WGA 11 and 19, male embryos. They were cultured in the following medium  
410 DMEM/F12 medium (1:1), P/S (100 U/mL), 0.1 mM cell culture grade 2- $\beta$ mercaptoethanol solution, 1% NEAA,  
411 0.5% N2 supplement, 1X B27 Supplement 100X (Thermo Fisher Scientific, 17504-044), 0,012% Bovine  
412 Albumin Fraction V (Thermo Fisher Scientific, 15260-037), 1,5 g/L glucose (Sigma-Aldrich, G8644). Washes  
413 for this type of cells were performed with a medium composed of DMEM/F12 medium (1:1), P/S (100 U/mL)  
414 and 0,015% Bovine Albumin Fraction V.

#### 415 Download of external datasets

416 BrainSpan dataset: pre-processed RpkM values for the BrainSpan Atlas were downloaded from here:  
417 <http://www.brainspan.org/static/download.html>. Dataset organisation was described in the following white  
418 paper: [https://help.brain-map.org/display/devhumanbrain/Documentation, Developmental Transcriptome](https://help.brain-map.org/display/devhumanbrain/Documentation,+Developmental+Transcriptome).

419 CO, FO and TA datasets: bulk RNA sequencing data were downloaded from Gene Expression Omnibus using  
420 the relative article accession numbers (GSE82022, GSE80073, GSE61476, respectively).

421 RNA extraction and library preparation for RNA-seq

422 Total RNA was extracted from snap-frozen pellets of CBO at day 25, 50, 100, 150, 200, fetal cortical  
423 progenitors and fetal brain tissues using the RNeasy Mini Kit (Qiagen, 74104). Purified RNA was quantified  
424 using a NanoDrop spectrophotometer and RNA quality was checked with an Agilent 2100 Bioanalyzer using  
425 the RNA nano kit (Agilent, 5067-1512). Library preparation for RNA sequencing was performed according to  
426 TruSeq Total RNA sample preparation protocol (Illumina, RS-122-2202), starting from 250 ng - 1 µg of total  
427 RNA. cDNA library quality was assessed at on Agilent 2100 Bioanalyzer, using the high sensitivity DNA kit  
428 (Agilent 5067-4626). Libraries were sequenced with the Illumina Novaseq machine at a read length of 50 bp  
429 paired-end and a coverage of 35 million of reads per sample.

430 RNAseq quantification for CBO, in-house fetal dataset, external brain organoids datasets

431 RNAseq FASTQ data were quantified at the gene level using Salmon (version 0.8.2,<sup>63</sup>). GRCh38 Genecode 27  
432 was used as reference for quantification and annotation. Data will be available in ArrayExpress public  
433 repository upon publication.

434 BrainSpan correlation analysis across developmental stages

435 The analysis was applied on BS specimens from prenatal and postnatal cortex . After selecting protein-coding  
436 genes, the mean expression was calculated for each stage (taking into account all the samples and sub-areas).  
437 Spearman correlation across samples was calculated and the correlation coefficient was visualized by  
438 heatmaps using pheatmap R package (<https://CRAN.R-project.org/package=pheatmap>).

## 439 Principal Component Analysis

440 BrainSpan: after selecting only samples from prenatal cortex, a filtering to discard not-expressed or low-  
441 expressed genes was applied by keeping genes with expression of at least 1 Rpkm in at least 1/4 of the  
442 samples (16824 genes selected).

443 Internal fetal dataset and CBO: a total of 66 samples considering CBO and internal fetal samples was used to  
444 perform PCA. Gene filtering using a threshold of 2 counts per million reads (cpm) in at least 2 samples was  
445 used, resulting in 17759 analysed. CBO dataset: a total of 43 samples considering CBO dataset (from day 25  
446 to day 200). Gene filtering using a threshold of 2 cpm in at least 4 samples was used, resulting 16901 genes  
447 used for the analysis.

448 For all datasets, PCA was computed using R prcomp function. For both BS and CBO PCA, gene loadings for  
449 PC1 and PC2 were retrieved from this analysis and the top 35 ones with positive and negative scores were  
450 visualised as lollipop graphs. The top 300 genes with the highest positive loading and the top 300 with the  
451 highest negative loading were selected to perform GO for biological processes using the TopGO package<sup>64</sup>,  
452 relying on Fisher test and Weight01 method. p-value < 0.01 and enrichment > 1.75 were used as thresholds  
453 to select significantly enriched GO terms.

## 454 WGCNA

### 455 BrainSpan

456 *Weighted Gene Co-expression network generation and module identification:*

457 After selecting only samples from prenatal cortex, not-expressed or low-expressed genes were discarded by  
458 keeping genes with expression of at least 1 Rpkm in at least 1/4 of the samples (16824 genes selected).  
459 Samples from post-conceptual weeks 25, 26 and 35 were identified as outliers by the sample clustering,  
460 and therefore excluded from downstream analyses. Starting from this set of 16824 genes measured in 157  
461 specimens, a gene selection strategy was applied by calculating for each gene the coefficient of variation (CV)  
462 across the experimental conditions after log-transformation. A 65-percentile threshold was then imposed,  
463 thus selecting the 35% of genes showing the highest values of CV (5889 genes). A signed gene co-expression  
464 network was generated relying on WGCNA R package (version 1.64.1,<sup>65</sup>). The correlation matrix was

465 calculated by applying a biweight mid-correlation and then transformed into an adjacency matrix by raising  
466 it to the power of  $\beta = 18$ . Topological Overlap Measure was calculated from the adjacency matrix and the  
467 relative dissimilarity matrix was used as input for average-linkage hierarchical clustering and gene  
468 dendrogram generation. Network modules were detected as branches of the dendrogram by using the  
469 DynamicTree Cut algorithm (deepSplit=1; minimum cluster size= 50; PAM stage TRUE; cutHeight 0.998,<sup>66</sup>.

470 *Module-trait correlation:*

471 As phenotypic trait for module-trait correlation, module eigengenes were related to each sample  
472 developmental stage (PCW), considered either as a continuous quantitative variable or dichotomized as a  
473 series of categorical variable (dummy variables).

474 *Module functional analysis:*

475 Gene ontology enrichment analysis for the Biological Process domain was performed on the genes belonging  
476 to each module of interest, using the list of 5889 genes selected for network generation as custom reference  
477 set. Analysis was performed by TopGO as described above. p-value < 0.01 and enrichment > 1.75 were used  
478 as thresholds to select significantly enriched GO terms.

479 *Sub-network visualization and analysis in Cytoscape:*

480 Node and edge information for the selected modules were exported from the adjacency matrix, selecting for  
481 each module the top-75 according to the intramodular connectivity and imposing a threshold of 0.2 as  
482 minimum edge weight. Nodes and edges for each module were therefore imported in Cytoscape (version  
483 3.8.2) for centrality analysis (CytoNCA,<sup>67</sup>).

484 CBO

485 The same pipeline used to perform WGCNA on BS was applied also to the CBO dataset. The analysis was  
486 performed on a total of 39 samples with in vitro age spanning from day 25 to day 200. Filtering was applied  
487 by keeping genes with an expression of at least 2 cpm in at least 7 samples (15663 genes selected). Coefficient  
488 of variation was calculated on log-transformed data and was set to 0.5, resulting in a total of 7831 genes  
489 considered for the analysis. The soft threshold  $\beta$  was set to 15. The DynamicTree Cut algorithm parameters  
490 used for gene module identification were DeepSplit of 1; minClusterSize 30; PAM stage TRUE; cutHeight  
491 0.999, for a total of 14 modules that were then characterised using the same approach described for BS.

492 For the generation of the bubble plot relative to CBO turquoise, black, blue and brown modules, REVIGO web  
493 tool was employed to summarize GO terms<sup>68</sup>.

#### 494 Differential Expression Analyses (DEA)

495 CBO: DEAs were performed for CBO in a stage-wise approach comparing each differentiation stage with the  
496 previous time-point using edgeR. Genes with expression levels higher than 2 cpm in at least 4 samples were  
497 tested for differential expression (16901 genes). The information about line identity was used as a covariate  
498 in the statistical model. DEGs were selected imposing as thresholds  $FDR < 0.05$  and absolute  $\log_2FC > 1$ . For  
499 each comparison, the number of DEGs, splitted in up-regulated or down-regulated, was represented by  
500 barplots. Functional enrichment analysis for the Biological Process domain of GO was performed by TopGO  
501 for every comparison dividing genes in up- and down-regulated.  $PValue < 0.01$  and enrichment  $> 2$  were used  
502 as thresholds to select significantly enriched GO terms.

503 Visualisation of DEA results between the different sequential CBO comparisons was performed using scatter  
504 plots visualizing the  $\log_2FC$  of all tested genes; the color-code was set according to FDR values. Gene resulting  
505 differentially expressed in both sequential CBO comparisons (e. g. day 50vs25 against day 100vs50) were  
506 identified and divided in 4 quadrants. In this way, the behaviour of genes in common between the two DEAs  
507 was analysed, thus finding genes up-regulated in both, down-regulated in both or up-regulated in one and  
508 down-regulated in the other. The top 10 protein coding genes in terms of absolute fold change for the four  
509 type of behaviours were labelled in the plot.

510 CO, FO and TA datasets: the same stage-wise DEA approach was applied for MGO, FO and TA, analysing each  
511 dataset independently Genes with expression levels higher than 2 cpm in at least 2 samples were tested for  
512 differential expression by edgeR (CO: 15339; FO: 16585; TA: 16522 genes). Line identity was used as a  
513 covariate for the TA dataset, while for CO and FO only one line was available. DEGs were selected and  
514 visualized as described for CBO.



## 515 Cortex-specific genes determination and visualization of their behaviour in CBO

516 DEAs of the different fetal tissues from our internal cohort versus hiPSC were performed for all areas  
517 including at least two samples using edgeR. Genes with expression levels higher than 2 cpm in at least 2  
518 samples were tested for differential expression (17275 genes). DEGs with FDR < 0.05 and absolute log<sub>2</sub>FC >  
519 3 were considered for further analysis. Cortex-specific DEGs were determined by subtracting to DEGs of the  
520 cortex vs hiPSC comparison DEGs found in the analysis between other tissues and hiPSC. Functional  
521 enrichment analysis for GO biological processes was performed by TopGO for cortex-specific genes dividing  
522 them in up- and down-regulated. PValue < 0.01 and enrichment > 2 were used as thresholds to select  
523 significantly enriched GO terms. The behaviour of cortex-specific DEGs in the CBO dataset, including hiPSC,  
524 was visualized by heatmap using average-linkage hierarchical clustering for rows.

## 525 Bulk deconvolution

526 Proportions of cell populations were estimated applying a deconvolution approach based on the SCDC  
527 algorithm<sup>69</sup> using bulk-RNASeq counts as input and a scRNAseq dataset of the developing human cortex<sup>38</sup> as  
528 reference. The single cell raw count expression matrix was filtered to discard low quality cells, by keeping  
529 cells compliant with the following threshold: mitochondrial RNA content < 5%; ribosomal protein RNA  
530 content < 50%; detected genes >450 and <3000; UMI counts >750 and < 10000. Starting from the clustering  
531 annotation performed in the original work, pericytes, microglia, endocytes and oligodendrocyte progenitors  
532 were not included, as we did not expect to find these cell type in CBO. The remaining cell populations were  
533 then grouped in the following 6 categories: ventricular Radial Glia (vRG); outer Radial Glia (oRG);  
534 Intermediate Progenitos (IP); cycling progenitors; interneurons: excitatory neurons. After deconvolution and  
535 for visualization purposes, the results were further grouped in two broader categories: progenitors (cycling  
536 progenitors + vRG) and neurons (excitatory neurons + inhibitory neurons). Cells with uncertain cell-type  
537 assignments were removed (SCDC qc threshold = 0.65). Cell proportions were retrieved using the SCDC\_prop  
538 function and were visualised as boxplots showing the proportion of every cell type per stage.

### 539 Correlation of BO transcriptome versus BS or versus CBO

540 Transcriptome-wide correlation was calculated on Fpkm (Rpkm for BS) after selecting protein-coding genes  
541 and filtering out lowly-expressed ones (mean expression levels lower than 1 Rpkm in at least 75% of samples  
542 (BrainSpan) and 1 Fpkm (Brain Organoids)). Mean expression per gene per stage was calculated for all BS  
543 prenatal cortical samples. Correlation was computed using Spearman metrics and visualised as separated  
544 heatmaps for each comparison. The same approach was applied to perform correlation of external brain  
545 organoid datasets against CBO.

### 546 Literature-curated gene signatures visualisation in BS and BO

547 Expression values (in  $\log_2$ Fpkm or  $\log_2$ Rpkm) for the gene signatures of interest were retrieved and the mean  
548 expression was calculated for each stage of every dataset, then visualized by lollipop plots.

### 549 Module overlap of BS and CBO WGCNA

550 Genes shared across the CBO and BrainSpan networks were selected for the analysis (2643); overlap across  
551 modules of interest was performed. Number of shared genes, odds ratio and p-value across CBO and  
552 BrainSpan modules were calculated by the GeneOverlap R package. Results were visualised as dot plot were  
553 numbers (shared genes) were shown for odds ratio  $>1$ , dots were shown for those having also p-value  $< 0.05$ .  
554 Color-code was assigned according to OR, dot size varied according to p-value.

### 555 Analysis of BS modules in BO and of CBO modules in BS and other brain BO

556 Module eigengene for each BrainSpan WGCNA module of interest was calculated in all organoid datasets as  
557 a prediction (R function predict) based on the module eigengene of BrainSpan itself. Likewise, module  
558 eigengene for each CBO WGCNA module of interest was calculated and predicted in BrainSpan and in  
559 external brain organoid datasets. Results were visualised as ribbon plots showing first principal component  
560 coefficients for each module along BrainSpan and organoid developmental time-points.

## 561 Statistical analyses

562 All bioinformatic analyses were performed using R version 3.4.4 except for the bulk deconvolution analysis  
563 performed using R version 3.6.1. The statistical details of all analysis can be found in the relative figure legend  
564 and text of the result section.

## 565 Data and code availability

566 Bulk RNAseq data generated in this study have been deposited in ArrayExpress and will be made available  
567 upon publication. No new algorithms were developed for this work, which employed well known tools such  
568 as edgeR and WGCNA (as documented in the method details). Code snippets for data processing and  
569 characterization/visualization of gene modules are already included as supplementary files. Similar code for  
570 all other analytical steps was versioned in a GitHub repository that will be made available upon publication  
571 (and whose access for reviewing purposes could be granted upon request).

## 572 **ACKNOWLEDGEMENTS**

573 The authors wish to thank the Wellcome Trust Sanger Institute, its funders and clinical collaborators, and Life  
574 Science Technologies Corporation for providing CTL2 hiPSCs. The authors wish to thank the University of  
575 Sheffield for providing CTL3 hiPSCs. The authors wish to thank the Genomic and Genetic Disorders Biobank  
576 at the IRCCS Casa Sollievo della Sofferenza, San Giovanni Rotondo for providing CTL4 fibroblasts. This work  
577 received funding from the European Research Council (ERC) (DISEASEAVATARS 616441 to GT); ENDpoiNTs,  
578 European Union's Horizon 2020 research and innovation program (grant no. 825759. to G.T.); S.T. performed  
579 this work while being PhD student within the European School of Molecular Medicine (SEMM). S.T. was  
580 funded by a fellowship FIRC-AIRC three-years fellowship "Assunta Lombardelli Giuliano Mordini" id. 24168.  
581 W.T.G. is supported by the British Columbia Children's Hospital Research Institute by an intramural IGAP  
582 research salary award. R.B.B. was supported by a PhD fellowship from the Science Without Borders Program  
583 (CAPES, Governo Dilma Rousseff, Brazil). The authors gratefully acknowledge the research participants who  
584 donated biopsies and/or tissue samples from themselves and their family members.

585 **AUTHOR CONTRIBUTIONS**

586 C.C. designed the analytical strategy of transcriptomic data. S.T. designed and performed CBO differentiation.  
587 C.C. and S.T. performed bioinformatic analyses. N.C. cultured human fetal primary stem cells and contributed  
588 to bioinformatic analyses. E.T., F.T. and N.C. helped with cortical organoids maintenance and library  
589 preparation. A.L.T. curated literature-derived gene signatures. W.T.G. provided skin fibroblasts of CTL1, and  
590 provided editorial comments on the manuscript. M.G. reprogrammed hiPSCs from CTL1's fibroblasts. R.B.B.  
591 and S.P. provided human fetal primary samples. C.C., S.T., A.L.T., and N.C. contributed to the study design,  
592 discussion of the results and critical reading of the manuscript. C.C., S.T and G.T. wrote the manuscript. G.T.  
593 conceived, designed, and supervised the study.

594 **DECLARATION OF INTERESTS**

595 Authors declare no competing interests.

596

597 **REFERENCES**

- 598 1. Parenti, I., Rabaneda, L. G., Schoen, H. & Novarino, G. Neurodevelopmental disorders: from genetics to  
599 functional pathways. *Trends Neurosci.* 43, 608–621 (2020).
- 600 2. Cheroni, C., Caporale, N. & Testa, G. Autism spectrum disorder at the crossroad between genes and  
601 environment: contributions, convergences, and interactions in ASD developmental pathophysiology. *Mol.*  
602 *Autism* 11, 69 (2020).
- 603 3. Villa, C. E. *et al.* CHD8 haploinsufficiency links autism to transient alterations in excitatory and inhibitory  
604 trajectories. *Cell Rep.* 39, 110615 (2022).
- 605 4. Paulsen, B. *et al.* Autism genes converge on asynchronous development of shared neuron classes. *Nature*  
606 602, 268–273 (2022).
- 607 5. Caporale, N. *et al.* From cohorts to molecules: Adverse impacts of endocrine disrupting mixtures. *Science*  
608 375, eabe8244 (2022).
- 609 6. Amin, N. D. & Paşca, S. P. Building Models of Brain Disorders with Three-Dimensional Organoids. *Neuron*  
610 100, 389–405 (2018).
- 611 7. Shi, Y., Wu, Q. & Wang, X. Modeling brain development and diseases with human cerebral organoids. *Curr.*  
612 *Opin. Neurobiol.* 66, 103–115 (2020).
- 613 8. Wang, M., Zhang, L. & Gage, F. H. Modeling neuropsychiatric disorders using human induced pluripotent  
614 stem cells. *Protein Cell* 11, 45–59 (2020).
- 615 9. Amiri, A. *et al.* Transcriptome and epigenome landscape of human cortical development modeled in  
616 organoids. *Science* 362, (2018).
- 617 10. Gordon, A. *et al.* Long-term maturation of human cortical organoids matches key early postnatal  
618 transitions. *Nat. Neurosci.* 24, 331–342 (2021).
- 619 11. Fleck, J. S. *et al.* Resolving organoid brain region identities by mapping single-cell genomic data to  
620 reference atlases. *Cell Stem Cell* 28, 1148–1159.e8 (2021).
- 621 12. Luo, C. *et al.* Cerebral organoids recapitulate epigenomic signatures of the human fetal brain. *Cell Rep.*  
622 17, 3369–3384 (2016).
- 623 13. Pollen, A. A. *et al.* Establishing Cerebral Organoids as Models of Human-Specific Brain Evolution. *Cell* 176,  
624 743–756.e17 (2019).
- 625 14. Bhaduri, A. *et al.* Cell stress in cortical organoids impairs molecular subtype specification. *Nature* 578,  
626 142–148 (2020).
- 627 15. Tanaka, Y., Cakir, B., Xiang, Y., Sullivan, G. J. & Park, I.-H. Synthetic Analyses of Single-Cell Transcriptomes  
628 from Multiple Brain Organoids and Fetal Brain. *Cell Rep.* 30, 1682–1689.e3 (2020).
- 629 16. López-Tobón, A. *et al.* Human cortical organoids expose a differential function of GSK3 on cortical  
630 neurogenesis. *Stem Cell Rep.* 13, 847–861 (2019).
- 631 17. Paşca, A. M. *et al.* Functional cortical neurons and astrocytes from human pluripotent stem cells in 3D  
632 culture. *Nat. Methods* 12, 671–678 (2015).
- 633 18. Qian, X. *et al.* Brain-Region-Specific Organoids Using Mini-bioreactors for Modeling ZIKV Exposure. *Cell*  
634 165, 1238–1254 (2016).

- 635 19. Mariani, J. *et al.* FOXG1-Dependent Dysregulation of GABA/Glutamate Neuron Differentiation in Autism  
636 Spectrum Disorders. *Cell* 162, 375–390 (2015).
- 637 20. Miller, J. A. *et al.* Transcriptional landscape of the prenatal human brain. *Nature* 508, 199–206 (2014).
- 638 21. Li, M. *et al.* Integrative functional genomic analysis of human brain development and neuropsychiatric  
639 risks. *Science* 362, (2018).
- 640 22. Obayashi, S., Tabunoki, H., Kim, S. U. & Satoh, J. Gene expression profiling of human neural progenitor  
641 cells following the serum-induced astrocyte differentiation. *Cell Mol. Neurobiol.* 29, 423–438 (2009).
- 642 23. Dahl, D. & Bignami, A. Immunohistological localization of desmin, the muscle-type 100 A filament protein,  
643 in rat astrocytes and Müller glia. *J. Histochem. Cytochem.* 30, 207–213 (1982).
- 644 24. Fink, K. L., López-Giráldez, F., Kim, I.-J., Strittmatter, S. M. & Cafferty, W. B. J. Identification of Intrinsic  
645 Axon Growth Modulators for Intact CNS Neurons after Injury. *Cell Rep.* 18, 2687–2701 (2017).
- 646 25. Borggrewe, M. *et al.* Regionally diverse astrocyte subtypes and their heterogeneous response to EAE. *Glia*  
647 69, 1140–1154 (2021).
- 648 26. Manning, T. J., Rosenfeld, S. S. & Sontheimer, H. Lysophosphatidic acid stimulates actomyosin contraction  
649 in astrocytes. *J. Neurosci. Res.* 53, 343–352 (1998).
- 650 27. Ferrier, R., Had, L., Rabié, A. & Faivre-Sarrailh, C. Coordinated expression of five tropomyosin isoforms  
651 and beta-actin in astrocytes treated with dibutyl cAMP and cytochalasin D. *Cell Motil. Cytoskeleton* 28, 303–  
652 316 (1994).
- 653 28. Magistri, M. *et al.* A comparative transcriptomic analysis of astrocytes differentiation from human neural  
654 progenitor cells. *Eur. J. Neurosci.* 44, 2858–2870 (2016).
- 655 29. Arnold, S. J. *et al.* The T-box transcription factor Eomes/Tbr2 regulates neurogenesis in the cortical  
656 subventricular zone. *Genes Dev.* 22, 2479–2484 (2008).
- 657 30. Chou, S.-J. & Tole, S. Lhx2, an evolutionarily conserved, multifunctional regulator of forebrain  
658 development. *Brain Res.* 1705, 1–14 (2019).
- 659 31. Chen, B. *et al.* The Fezf2-Ctip2 genetic pathway regulates the fate choice of subcortical projection neurons  
660 in the developing cerebral cortex. *Proc. Natl. Acad. Sci. USA* 105, 11382–11387 (2008).
- 661 32. Sloan, S. A. *et al.* Human Astrocyte Maturation Captured in 3D Cerebral Cortical Spheroids Derived from  
662 Pluripotent Stem Cells. *Neuron* 95, 779–790.e6 (2017).
- 663 33. Iliff, J. J. *et al.* A paravascular pathway facilitates CSF flow through the brain parenchyma and the  
664 clearance of interstitial solutes, including amyloid  $\beta$ . *Sci. Transl. Med.* 4, 147ra111 (2012).
- 665 34. Sherrod, M., Liu, X., Zhang, X. & Sigmund, C. D. Nuclear localization of angiotensinogen in astrocytes. *Am.*  
666 *J. Physiol. Regul. Integr. Comp. Physiol.* 288, R539–46 (2005).
- 667 35. Trevino, A. E. *et al.* Chromatin and gene-regulatory dynamics of the developing human cerebral cortex at  
668 single-cell resolution. *Cell* 184, 5053–5069.e23 (2021).
- 669 36. Trujillo, C. A. *et al.* Complex Oscillatory Waves Emerging from Cortical Organoids Model Early Human  
670 Brain Network Development. *Cell Stem Cell* 25, 558–569.e7 (2019).
- 671 37. Velasco, S. *et al.* Individual brain organoids reproducibly form cell diversity of the human cerebral cortex.  
672 *Nature* 570, 523–527 (2019).

- 673 38. Polioudakis, D. *et al.* A Single-Cell Transcriptomic Atlas of Human Neocortical Development during Mid-  
674 gestation. *Neuron* 103, 785–801.e8 (2019).
- 675 39. Park, Y. P. *et al.* Single-cell deconvolution of 3,000 post-mortem brain samples for eQTL and GWAS  
676 dissection in mental disorders. *BioRxiv* (2021). doi:10.1101/2021.01.21.426000
- 677 40. Costamagna, G., Comi, G. P. & Corti, S. Advancing Drug Discovery for Neurological Disorders Using iPSC-  
678 Derived Neural Organoids. *Int. J. Mol. Sci.* 22, (2021).
- 679 41. Yoon, S.-J. *et al.* Reliability of human cortical organoid generation. *Nat. Methods* 16, 75–78 (2019).
- 680 42. Kohwi, M. *et al.* A subpopulation of olfactory bulb GABAergic interneurons is derived from Emx1- and  
681 Dlx5/6-expressing progenitors. *J. Neurosci.* 27, 6878–6891 (2007).
- 682 43. Schiweck, J., Eickholt, B. J. & Murk, K. Important shapeshifter: mechanisms allowing astrocytes to respond  
683 to the changing nervous system during development, injury and disease. *Front. Cell Neurosci.* 12, 261 (2018).
- 684 44. Krencik, R. & Ullian, E. M. A cellular star atlas: using astrocytes from human pluripotent stem cells for  
685 disease studies. *Front. Cell Neurosci.* 7, 25 (2013).
- 686 45. Petrelli, F., Pucci, L. & Bezzi, P. Astrocytes and Microglia and Their Potential Link with Autism Spectrum  
687 Disorders. *Front. Cell Neurosci.* 10, 21 (2016).
- 688 46. Notter, T. Astrocytes in schizophrenia. *Brain Neurosci. Adv.* 5, 23982128211009148 (2021).
- 689 47. Maragakis, N. J. & Rothstein, J. D. Mechanisms of Disease: astrocytes in neurodegenerative disease. *Nat.*  
690 *Clin. Pract. Neurol.* 2, 679–689 (2006).
- 691 48. Hu, B.-Y. *et al.* Neural differentiation of human induced pluripotent stem cells follows developmental  
692 principles but with variable potency. *Proc. Natl. Acad. Sci. USA* 107, 4335–4340 (2010).
- 693 49. Koehler, K. R. *et al.* Extended passaging increases the efficiency of neural differentiation from induced  
694 pluripotent stem cells. *BMC Neurosci.* 12, 82 (2011).
- 695 50. Lalli, M. A., Avey, D., Dougherty, J. D., Milbrandt, J. & Mitra, R. D. High-throughput single-cell functional  
696 elucidation of neurodevelopmental disease-associated genes reveals convergent mechanisms altering  
697 neuronal differentiation. *Genome Res.* 30, 1317–1331 (2020).
- 698 51. Schafer, S. T. *et al.* Pathological priming causes developmental gene network heterochronicity in autistic  
699 subject-derived neurons. *Nat. Neurosci.* 22, 243–255 (2019).
- 700 52. Fietz, S. A. *et al.* Transcriptomes of germinal zones of human and mouse fetal neocortex suggest a role of  
701 extracellular matrix in progenitor self-renewal. *Proc. Natl. Acad. Sci. USA* 109, 11836–11841 (2012).
- 702 53. Long, K. R. *et al.* Extracellular Matrix Components HAPLN1, Lumican, and Collagen I Cause Hyaluronic  
703 Acid-Dependent Folding of the Developing Human Neocortex. *Neuron* 99, 702–719.e6 (2018).
- 704 54. Franco, S. J., Martinez-Garay, I., Gil-Sanz, C., Harkins-Perry, S. R. & Müller, U. Reelin regulates cadherin  
705 function via Dab1/Rap1 to control neuronal migration and lamination in the neocortex. *Neuron* 69, 482–497  
706 (2011).
- 707 55. Wiese, S., Karus, M. & Faissner, A. Astrocytes as a source for extracellular matrix molecules and cytokines.  
708 *Front. Pharmacol.* 3, 120 (2012).
- 709 56. Florio, M. *et al.* Human-specific gene ARHGAP11B promotes basal progenitor amplification and neocortex  
710 expansion. *Science* 347, 1465–1470 (2015).

- 711 57. Sugiyama, S. *et al.* Experience-dependent transfer of Otx2 homeoprotein into the visual cortex activates  
712 postnatal plasticity. *Cell* 134, 508–520 (2008).
- 713 58. Gogolla, N., Caroni, P., Lüthi, A. & Herry, C. Perineuronal nets protect fear memories from erasure. *Science*  
714 325, 1258–1261 (2009).
- 715 59. Gisabella, B., Babu, J., Valeri, J., Rexrode, L. & Pantazopoulos, H. Sleep and memory consolidation  
716 dysfunction in psychiatric disorders: evidence for the involvement of extracellular matrix molecules. *Front.*  
717 *Neurosci.* 15, 646678 (2021).
- 718 60. Koskinen, M.-K., van Mourik, Y., Smit, A. B., Riga, D. & Spijker, S. From stress to depression: development  
719 of extracellular matrix-dependent cognitive impairment following social stress. *Sci. Rep.* 10, 17308 (2020).
- 720 61. Yoshioka, N. *et al.* Efficient generation of human iPSCs by a synthetic self-replicative RNA. *Cell Stem Cell*  
721 13, 246–254 (2013).
- 722 62. Bressan, R. B. *et al.* Regional identity of human neural stem cells determines oncogenic responses to  
723 histone H3.3 mutants. *Cell Stem Cell* (2021). doi:10.1016/j.stem.2021.01.016
- 724 63. Patro, R., Duggal, G., Love, M. I., Irizarry, R. A. & Kingsford, C. Salmon provides fast and bias-aware  
725 quantification of transcript expression.. 2017;(4): 417-419 | *Nat. Methods*.
- 726 64. Alexa, A., Rahnenführer, J. & Lengauer, T. Improved scoring of functional groups from gene expression  
727 data by decorrelating GO graph structure. *Bioinformatics* 22, 1600–1607 (2006).
- 728 65. Langfelder, P. & Horvath, S. WGCNA: an R package for weighted correlation network analysis. *BMC*  
729 *Bioinformatics* 9, 559 (2008).
- 730 66. Langfelder, P., Zhang, B. & Horvath, S. Defining clusters from a hierarchical cluster tree: the Dynamic Tree  
731 Cut package for R. *Bioinformatics* 24, 719–720 (2008).
- 732 67. Tang, Y., Li, M., Wang, J., Pan, Y. & Wu, F.-X. CytoNCA: a cytoscape plugin for centrality analysis and  
733 evaluation of protein interaction networks. *Biosystems* 127, 67–72 (2015).
- 734 68. Supek, F. BoÅi njak M, Skunca N, Smuc T. *PLoS One* (2011).
- 735 69. Dong, M. *et al.* SCDC: bulk gene expression deconvolution by multiple single-cell RNA sequencing  
736 references. *Brief. Bioinformatics* (2020). doi:10.1093/bib/bbz166



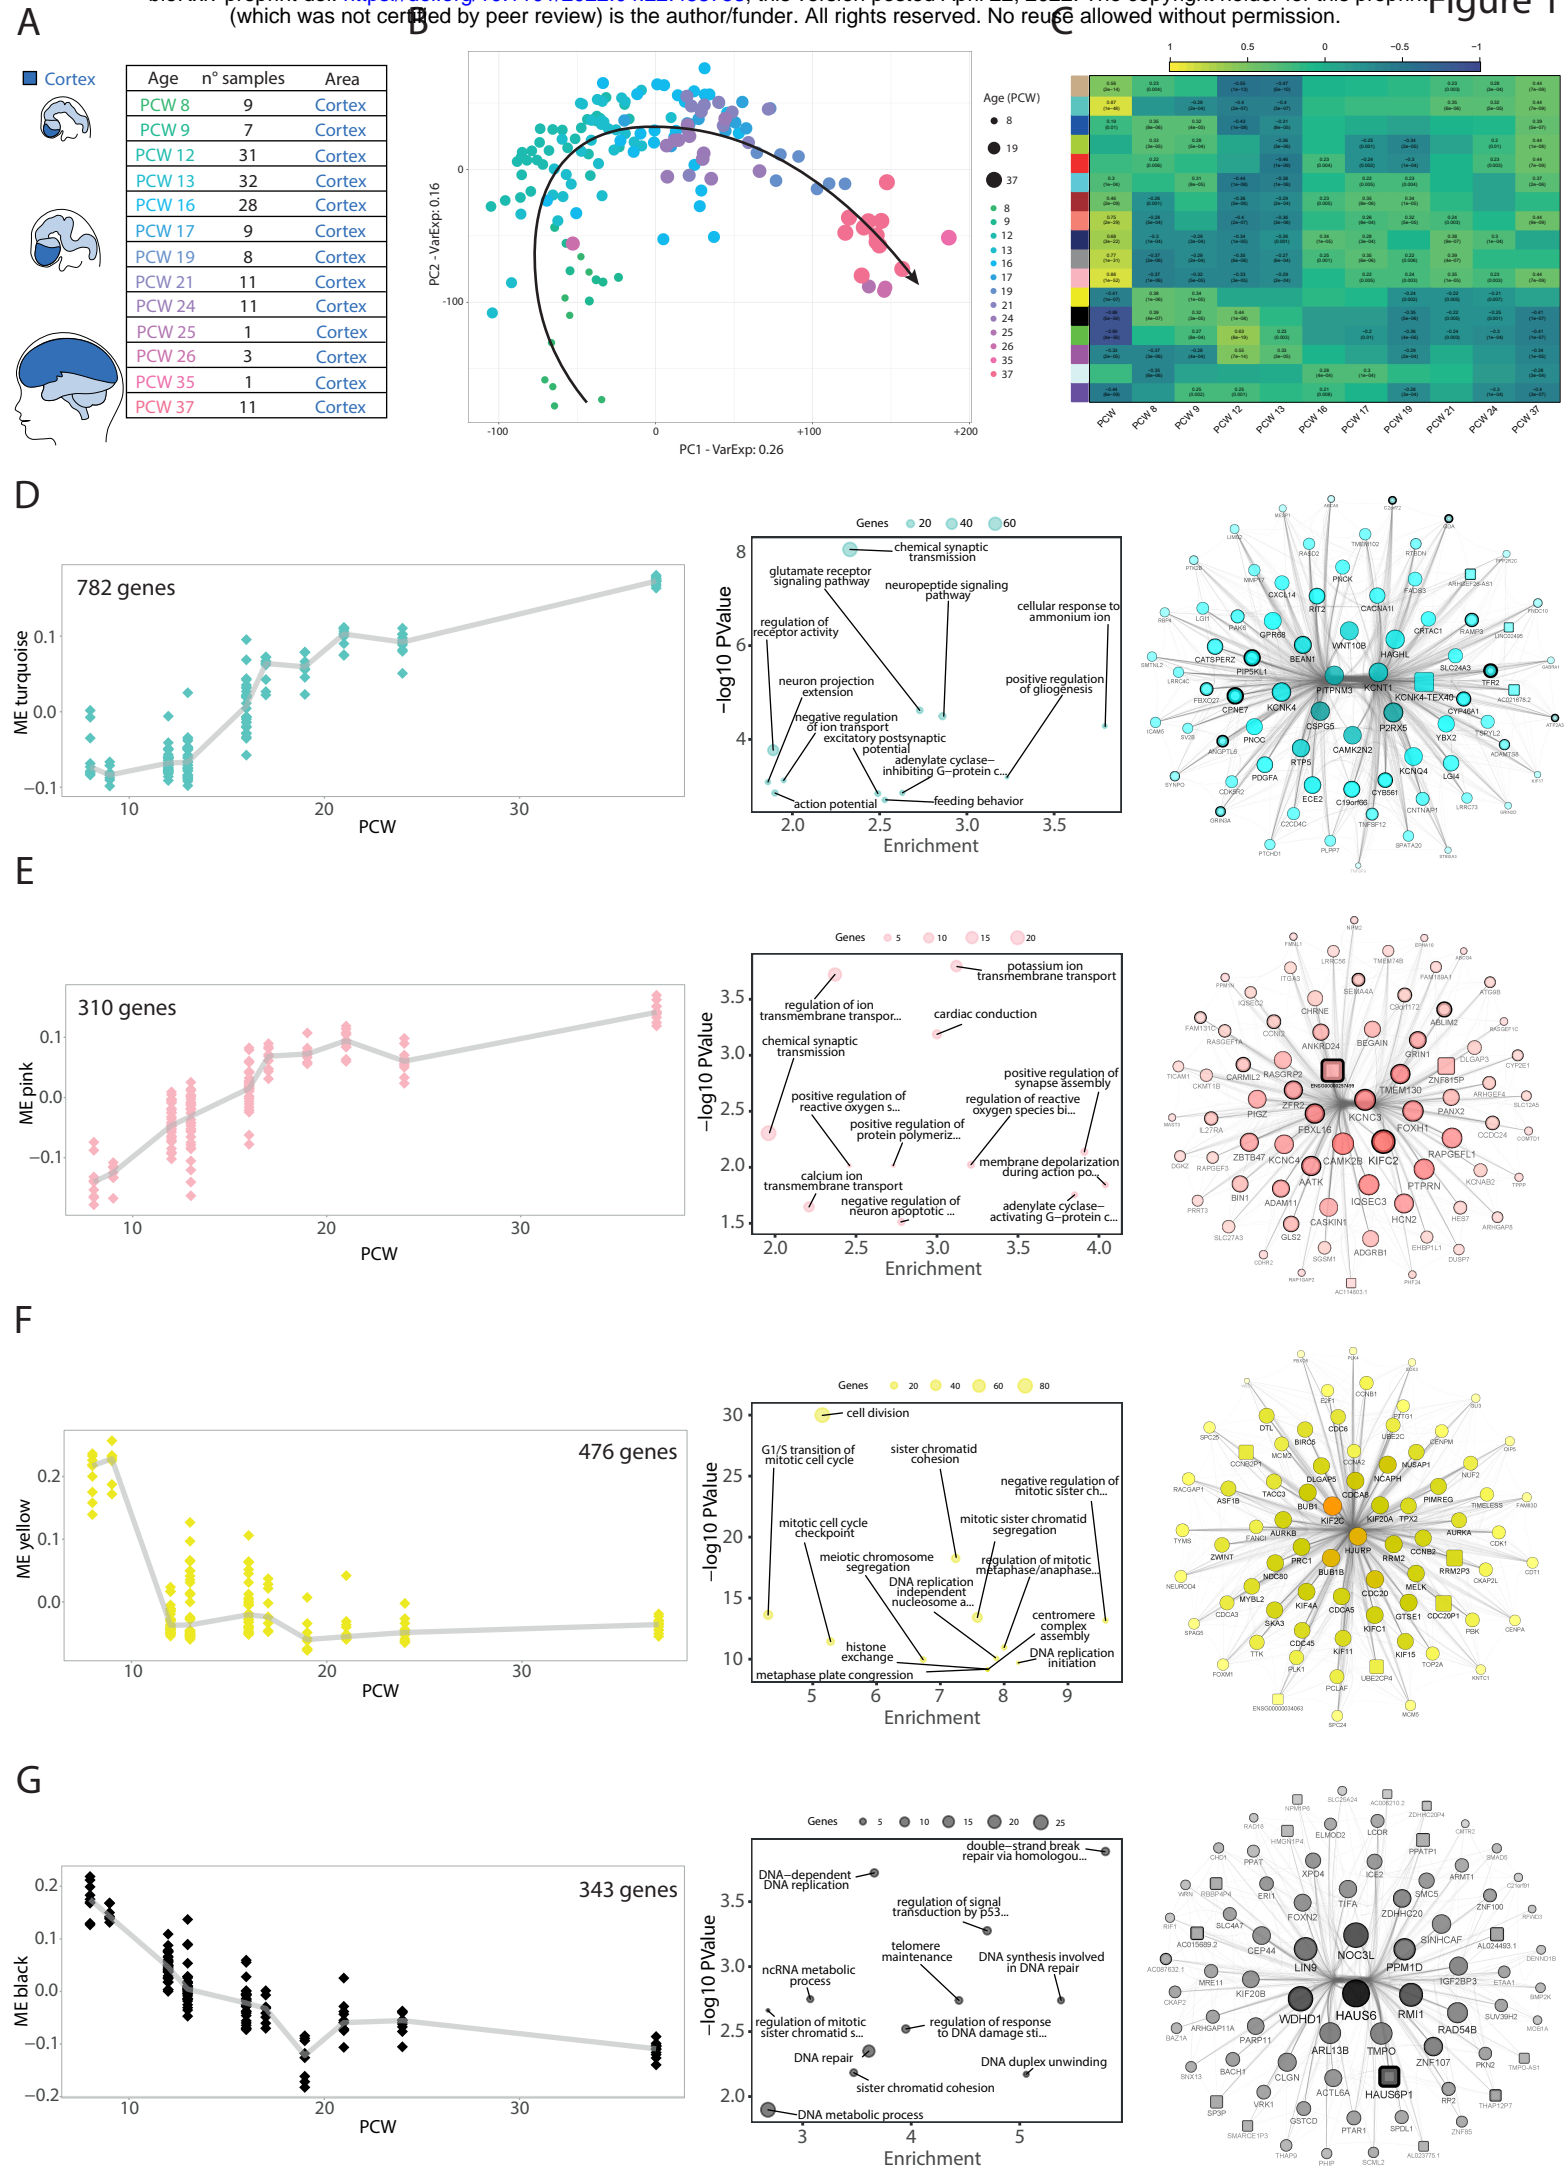

**Figure 1:** Reconstruction of transcriptional programs of the developing fetal cortex

**(A)** Cohort of fetal cortical samples from the BS Atlas. The number of specimens for each post-conceptual week (PCW) is reported, for a total of 162 bulk RNASeq data points. **(B)** PCA on prenatal cortical samples from BS. Dot color and size is set according to developmental stage. **(C)** WGCNA pinpoints gene modules in the developing cortex. The heatmap shows the correlation between the first principal component of each module (module eigengene, ME) and the developmental stage, either as a continuous variable (PCW) or a categorical variable for each stage. Coefficients of correlation were calculated using Spearman correlation; p-values are reported for significant correlations (p-value < 0.01). Each row represents a gene module and it is identified as with a specific color. **(D-G)** Characterization of BS\_Turquoise, BS\_Pink, BS\_Yellow and BS\_Black modules. For each module, ribbon plots visualize the behaviour of the ME (Y-axis) through developmental stages; each dot represents a data point, while the line connects the median value for each PCW. The bubble plots show the p-value (Y-axis) and enrichment score (X-axis) for the top-12 GO categories (ranked according to p-value, Biological Process domain of the ontology); dot size represents the number of module genes belonging to the GO term. Network reconstruction for the top-75 genes of each module, selected according to the intramodular connectivity. Degree, closeness, betweenness and eigenvector are represented by node label transparency, node colour darkness, node border width, and node size/node label font size, respectively. Node shape represents gene biotype, with protein coding genes as circles and non-coding genes as squares.

A

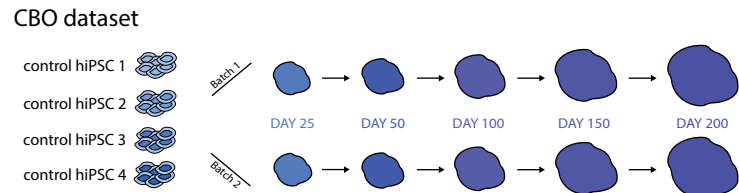

**Human fetal CNS tissue dataset**

| Area         | n° samples | Age         |
|--------------|------------|-------------|
| Cortex       | 2          | WGA 13 & 15 |
| MGE          | 2          | WGA 13 & 15 |
| LGE          | 1          | WGA 13      |
| Striatum     | 1          | WGA 15      |
| Diencephalon | 2          | WGA 13 & 15 |
| MidBrain     | 2          | WGA 13 & 15 |
| Pons         | 2          | WGA 13 & 15 |
| Cerebellum   | 2          | WGA 13 & 15 |
| Medulla      | 1          | WGA 15      |
| Spinal Cord  | 1          | WGA 13      |

**Human fetal 2D-cultured cells**

| Area   | n° samples | Age    |
|--------|------------|--------|
| Cortex | 6          | WGA 11 |
| Cortex | 5          | WGA 19 |

B

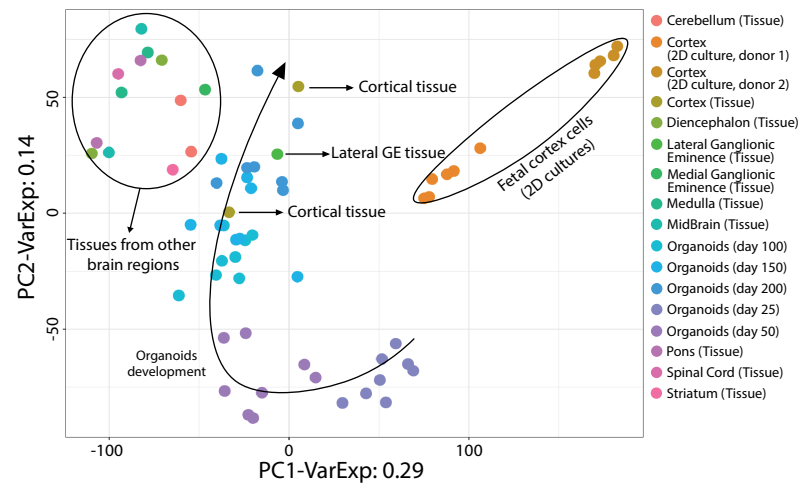

C

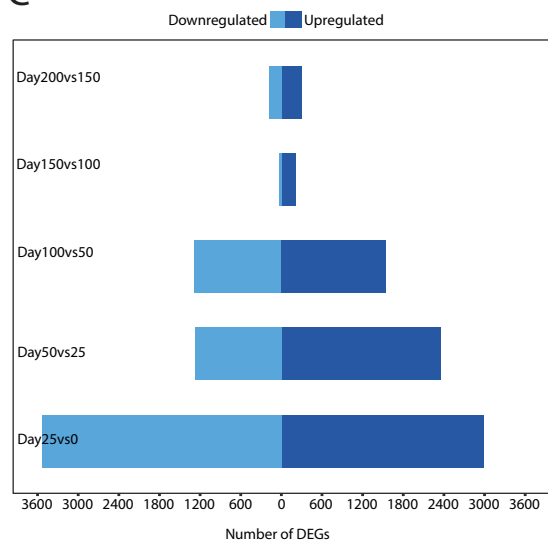

D

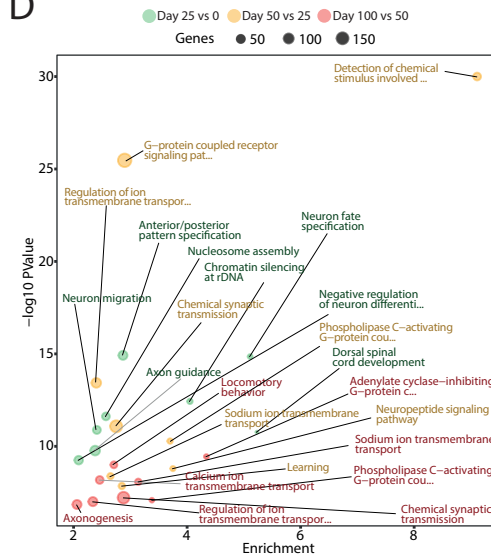

E

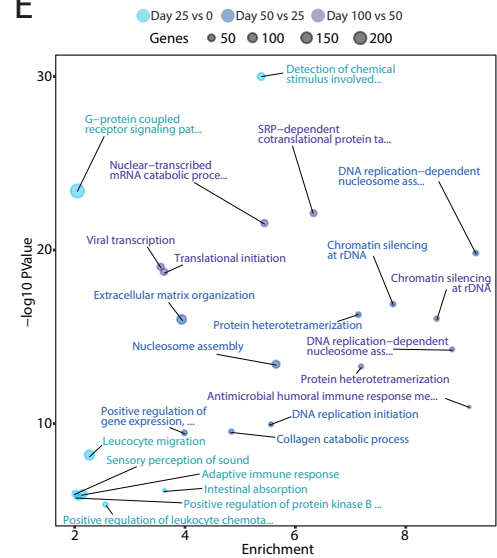

F

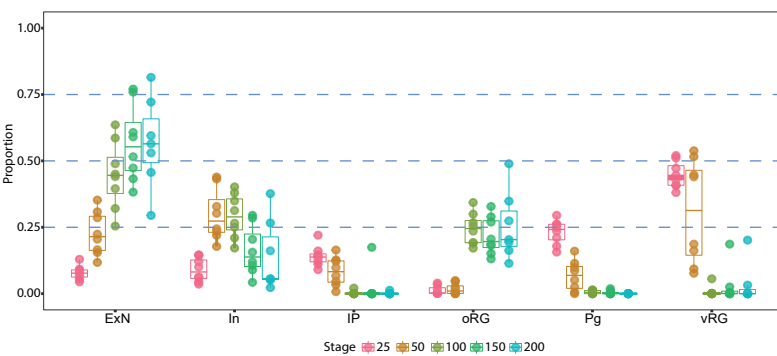

G

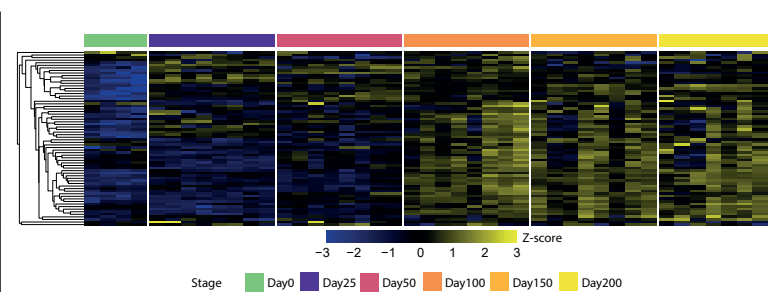

H

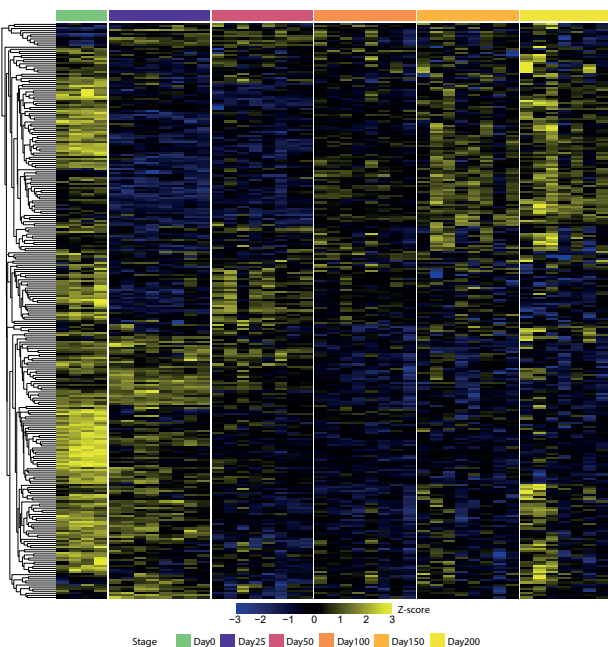

I

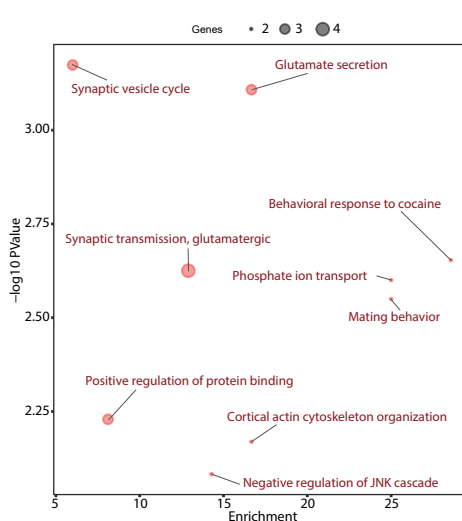

J

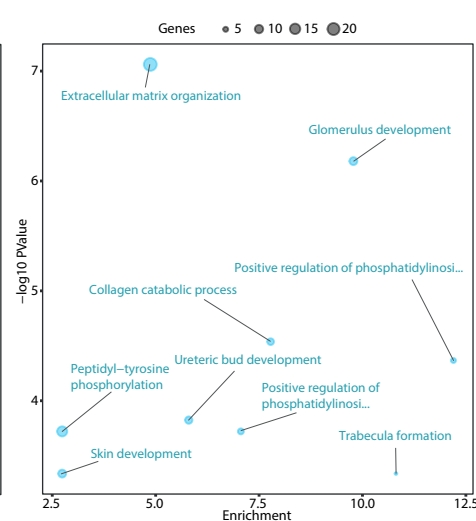

**Figure 2:** Principal Component and Differential Expression analyses uncovered CBO temporal dynamics

**(A)** Experimental design, detailing the number of individuals, batches and time-points for CBO and number of samples, brain area and WGA for fetal samples. **(B)** PCA on CBO, fetal brain tissues and 2D cultured fetal cortical progenitors, distinguished by dot color. The arrow highlights the distribution of CBO samples throughout stage progression. **(C)** Number of DEGs (FDR < 0.05, log<sub>2</sub>FC > 1 as absolute value) from stage-wise differential expression analysis in CBO dataset. Barplots show the number of up-regulated and down-regulated genes for each comparison. **(D-E)** Bubble plots showing the functional characterization of up-regulated (D) and down-regulated (E) genes by functional enrichment analysis for the following comparisons: (I) Day25 vs Day0; (II) Day50 vs Day25; (III) Day100 vs Day50. The top-8 GO categories from the Biological Process domain of the GO are reported for each comparison. **(F)** Box plots displaying the estimated proportion of excitatory neurons (ExN), inhibitory neurons (In), intermediate progenitors (IP), outer radial glia (oRG), cycling progenitors (Pg), and ventricular radial glia (vRG) from deconvolution in each stage of CBO differentiation. **(G-H)** Heatmaps showing the behaviour of cortex-specific up-regulated (G) and down-regulated (H) DEGs in the CBO dataset. Values are shown as Z-scores calculated on the expression values. **(I-J)** Bubble plots showing the functional characterization of the genes in G and H, respectively.

**A**

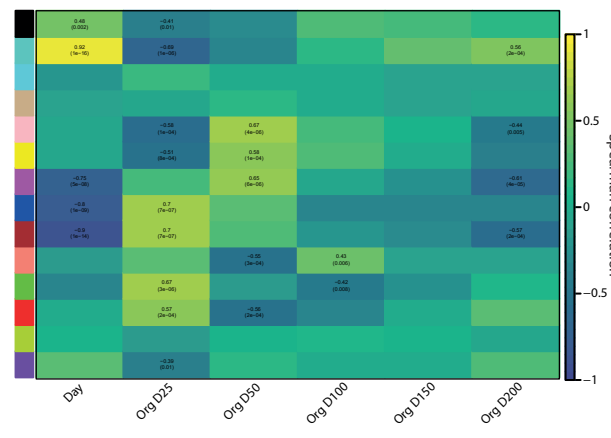

**B**

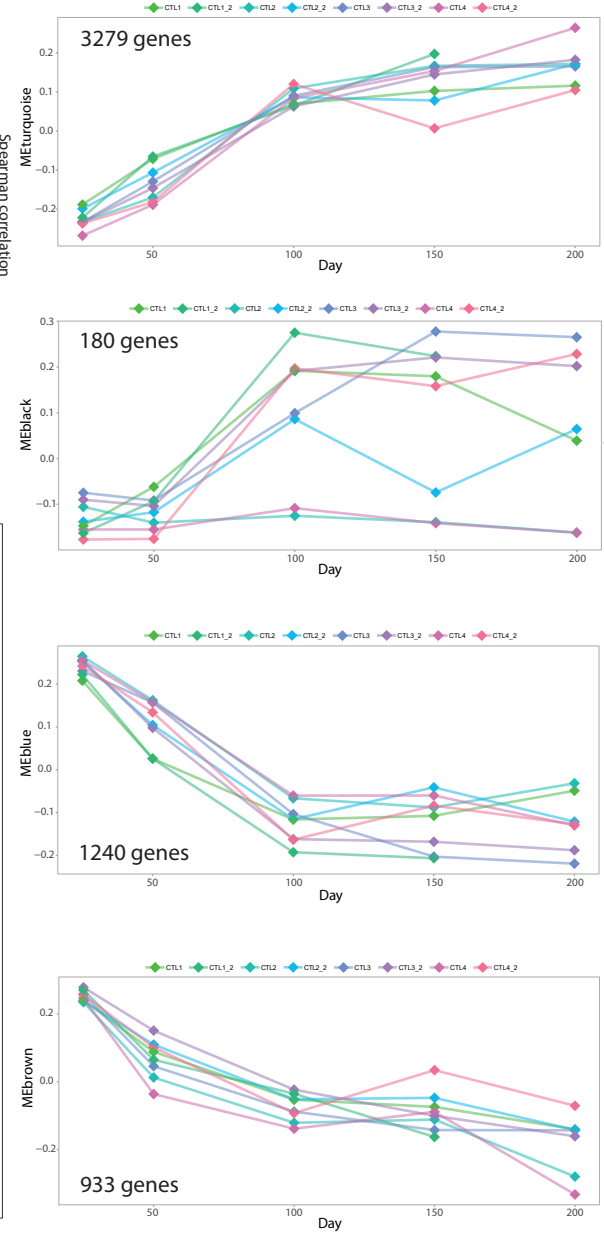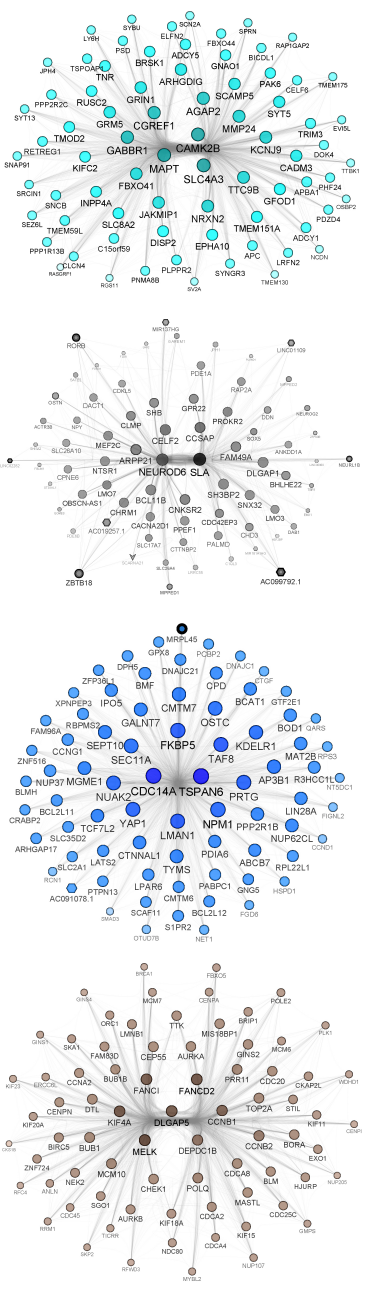

**C**

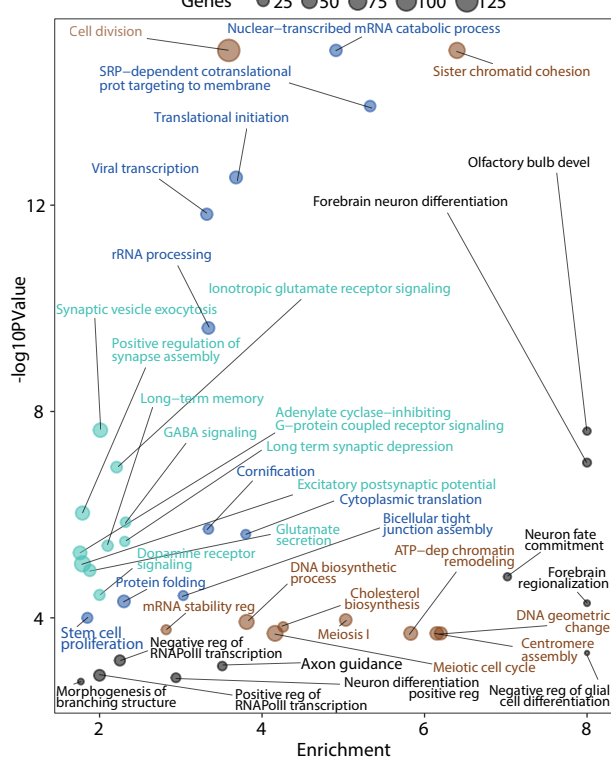

**Figure 3:** Cortical organoids evolve towards the glutamatergic fate

**(A)** Heatmap showing the correlation between each gene module (summarized as ME) and CBO differentiation stage either as a continuous variable (Day) or a categorical variable for each time-point. Correlation coefficient and p-values are reported for significant correlations (Spearman p-value < 0.01). **(B)** Characterization of CBO\_Turquoise, CBO\_Black, CBO\_Blue and CBO\_Brown gene modules. For each module, the ribbon plot visualizes the behaviour of the module eigengene throughout differentiation time-points; each dot represents a data point, while the line connects timepoints of the same replicate (line and differentiation batch). Network reconstruction for the top-75 genes of each module, selected according to the intramodular connectivity value. Degree, closeness, betweenness and eigenvector are represented by node label transparency, node colour darkness, node border width, and node size/node label font size, respectively. Node shape represents gene biotype, with protein coding genes as circles and non-coding genes as squares. **(C)** Bubble plot depicting the results of GO enrichment analysis for the four modules: p-values and enrichment scores are reported.

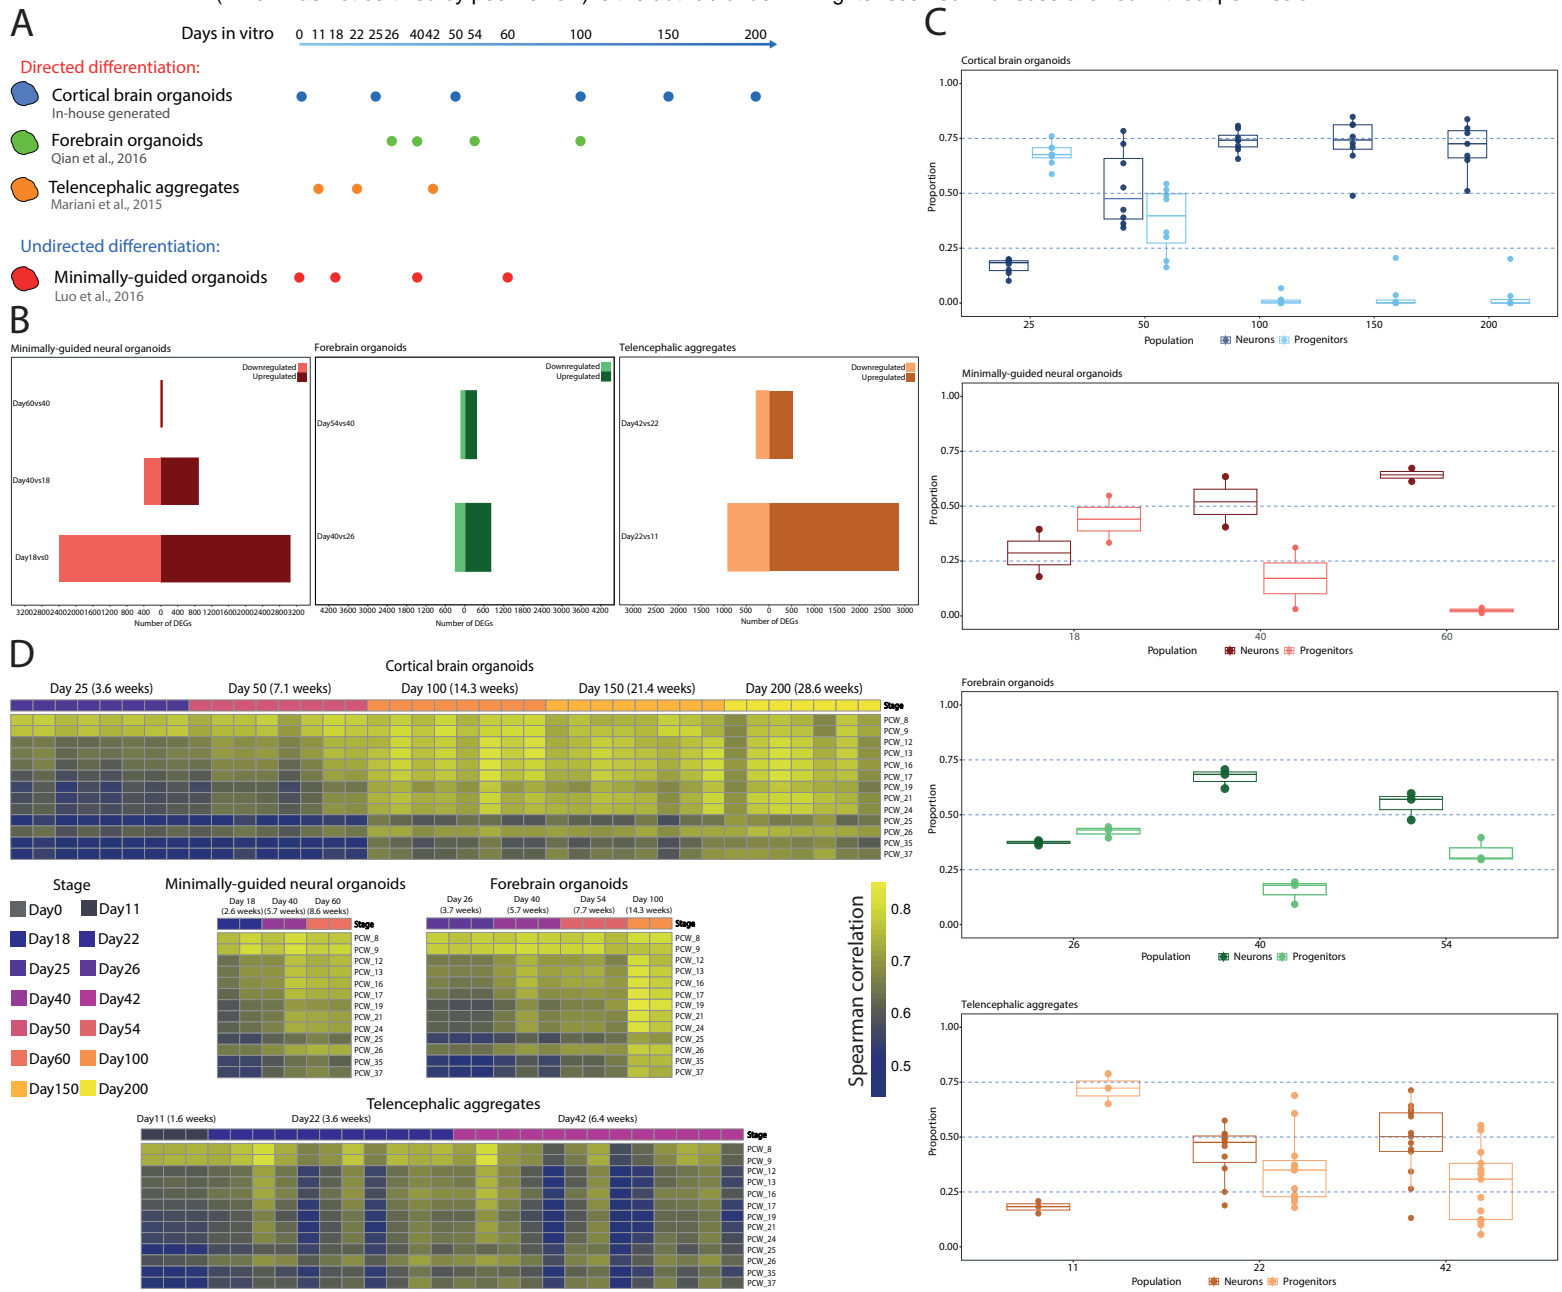

**Figure 4:** BO differentially recapitulated the timing of corticogenesis

**(A)** Schematic representation of in-house and external BO datasets and relative differentiation timepoints (CBO: Cortical Brain Organoids; FO: forebrain organoids; TA: telencephalic aggregates; MGO: minimally-guided neural organoids). **(B)** Stage-wise differential expression analysis in MGO, FO and TA. Barplots reporting the number of DEGs (FDR < 0.05, log<sub>2</sub>FC > 1 as absolute value), shown as up-regulated and down-regulated genes for each comparison. **(C)** Boxplots reporting the fraction of Progenitors and Neurons estimated by bulk deconvolution in each organoid dataset. **(D)** Correlation analysis of organoid datasets against the BS fetal cortex. Heatmaps visualize the correlation coefficient (Spearman correlation) for each organoid data point and each BS PCW.



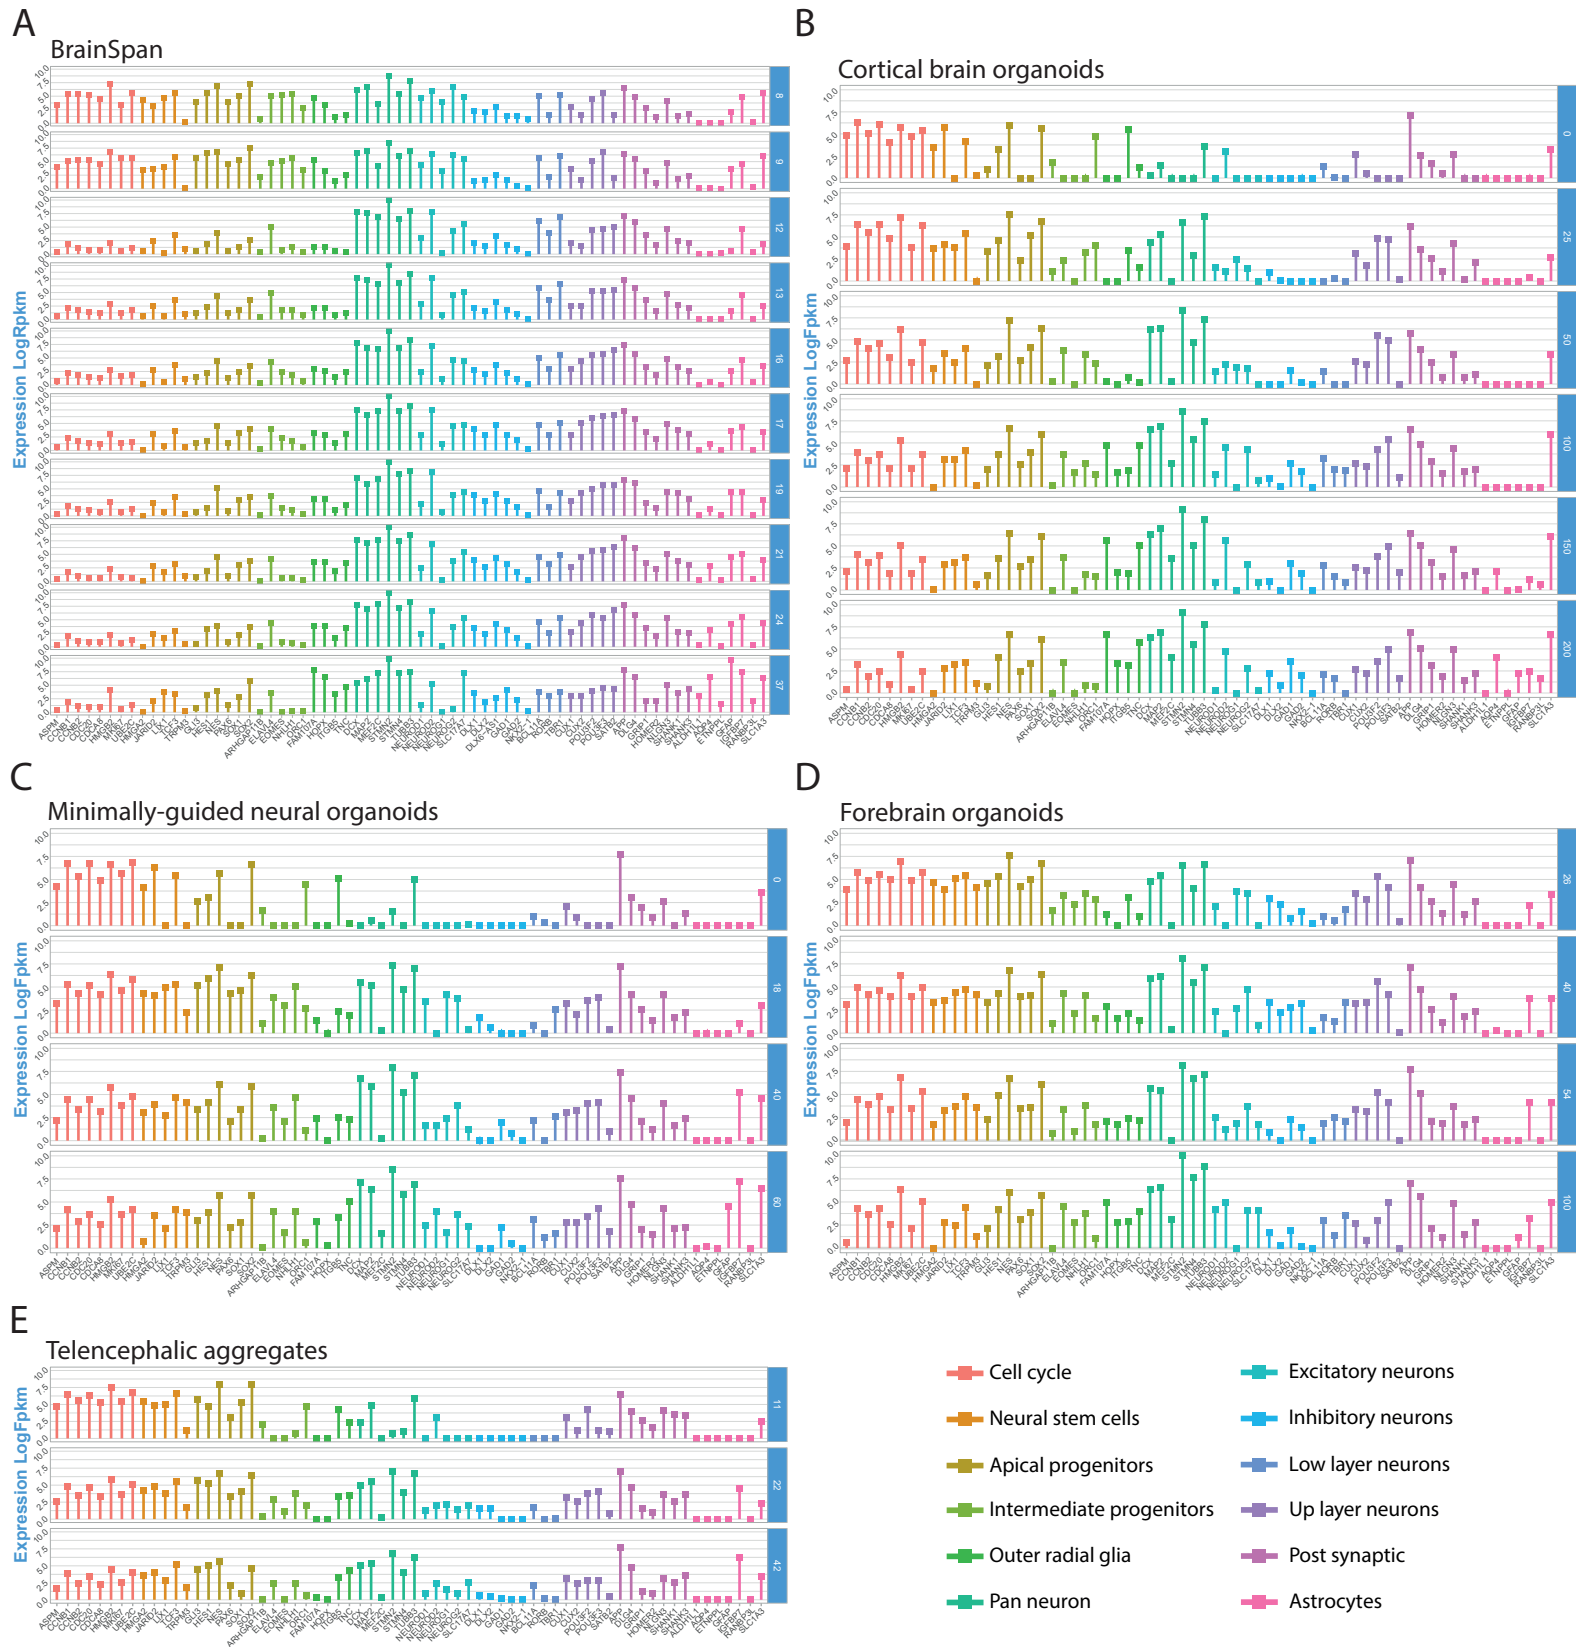

**Figure 5:** Gene expression levels of signatures related to cell population identity and function in BO  
Expression levels (Log2Fpkm or Log2Rpm) in BS **(A)**, CBO **(B)**, MGO **(C)**, FO **(D)** and TA **(E)** along time-points are reported in each dataset as the mean value across replicates. Each bar colour corresponds to a specific signature, as reported in the plot legend.

A

BrainSpan: monotonic behaviour with increased expression over developmental time

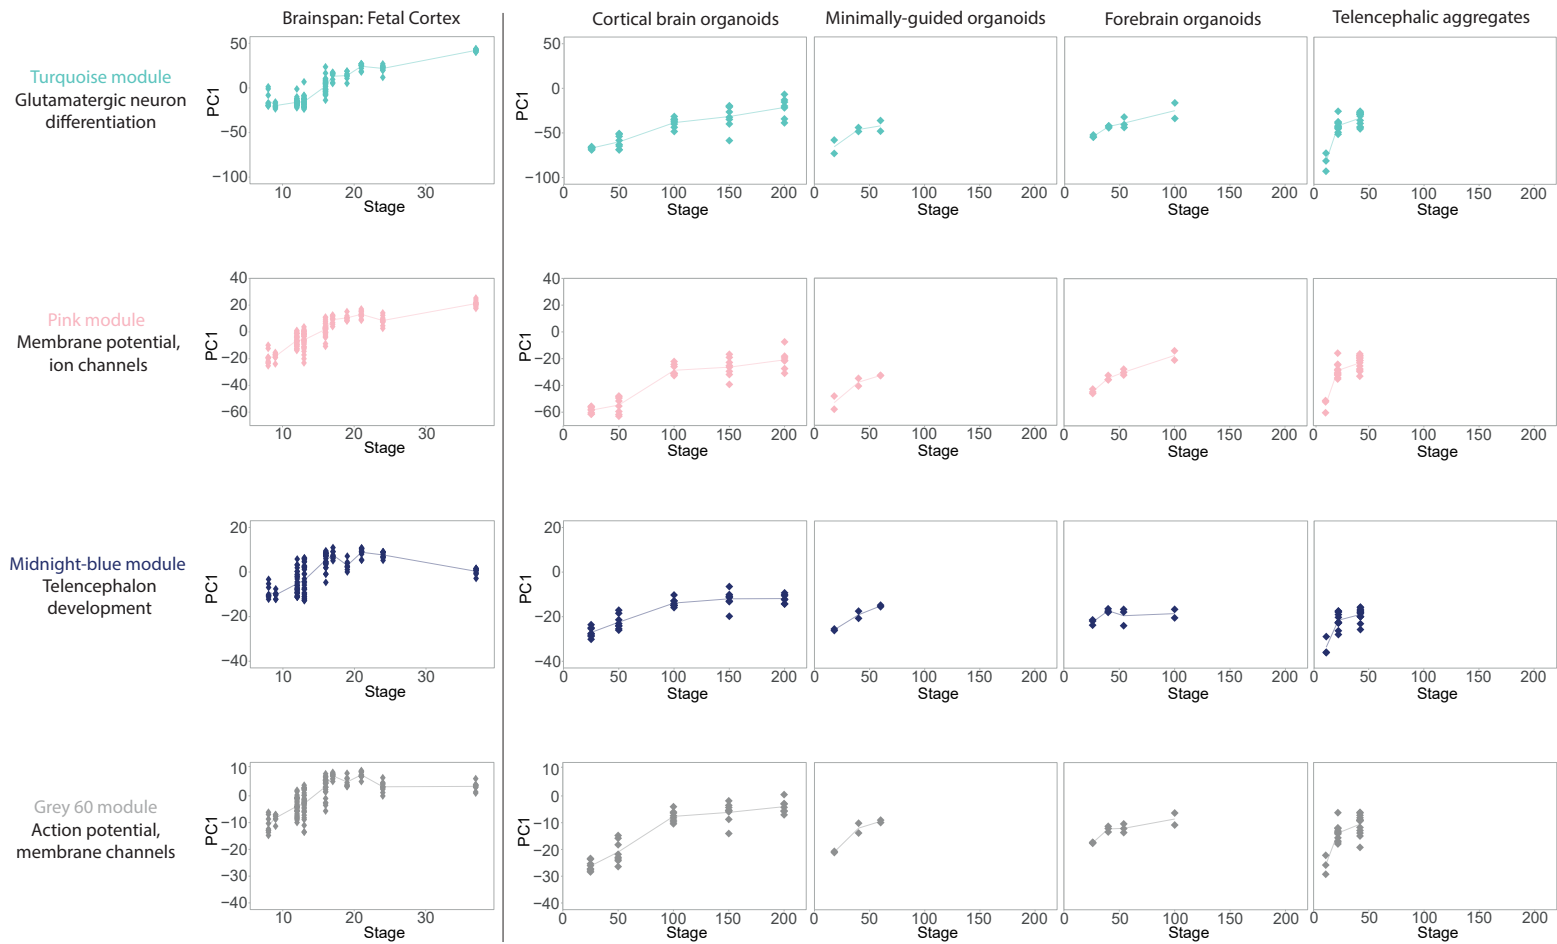

B

BrainSpan: monotonic behaviour with decreased expression over developmental time

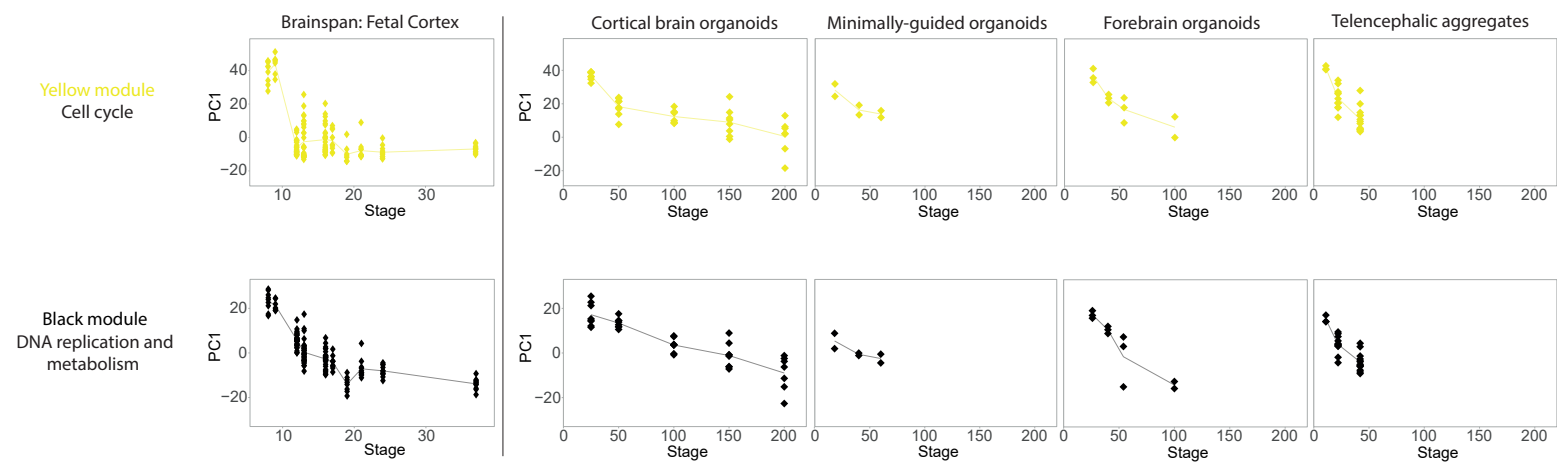

C

BrainSpan: non-monotonic behaviour

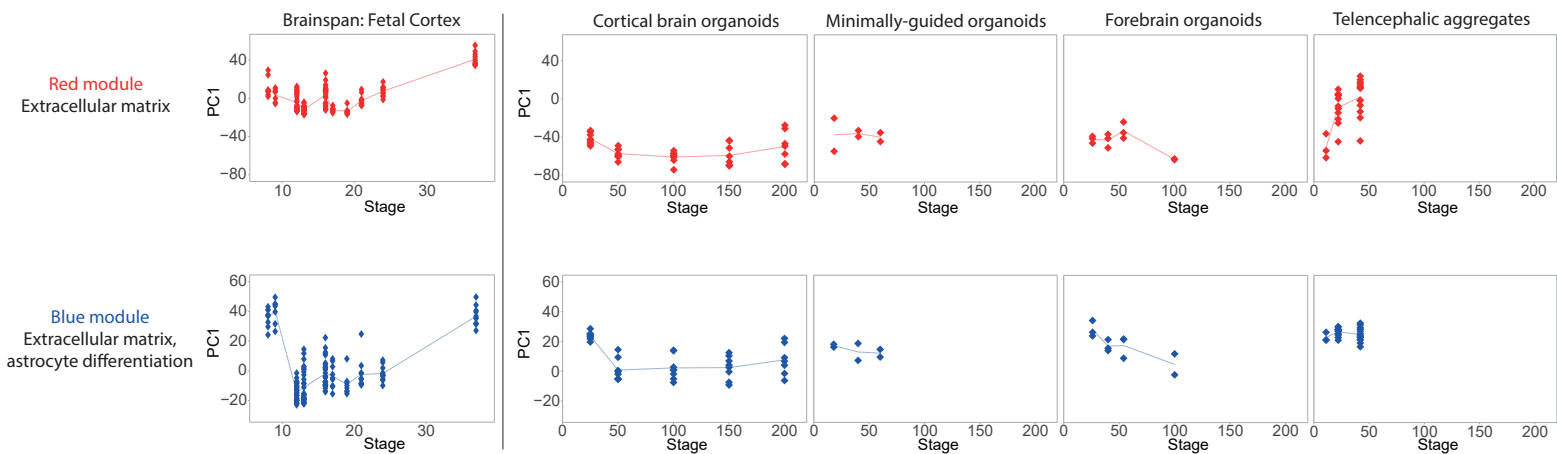

**Figure 6:** Behaviour of the module eigengene for BrainSpan gene co-expression patterns in BO

**(A)** Visualization of BS\_Turquoise, BS\_Pink, BS\_Midnightblue and BS\_Grey60 in prenatal fetal cortex as well as in the BO datasets. PCA was performed to calculate the module eigengene on the BrainSpan and then applied to each BO dataset. Each dot represents a data point, while the line connects the median value for each post-conceptual week (BS) or differentiation day (BO). The same analysis and visualization was applied to BS modules with a decreased expression along development **(B)** or with a non-monotonic behaviour **(C)**.
